1 Germline protein, Cup, non-cell autonomously limits migratory cell fate in  
2 *Drosophila* oogenesis.

3  
4  
5  
6  
7  
8  
9 Banhisikha Saha<sup>1, 2, 3</sup>, Sayan Acharjee<sup>1,3</sup>, Gaurab Ghosh<sup>1</sup>, Purbasa Dasgupta<sup>1</sup>, and  
10 Mohit Prasad<sup>1\*</sup>  
11

12 1: Department of Biological Sciences

13 Indian Institute of Science Education & Research- Kolkata

14 Mohanpur Campus

15 Mohanpur - 741246, Nadia,

16 West Bengal, India

17 +91-(0)33-61360000 Extn 1207 phone

18 [mohitprasad@iiserkol.ac.in](mailto:mohitprasad@iiserkol.ac.in)  
19

20 2: Laboratory of Malaria and Vector Research,  
21 National Institute of Allergy and Infectious Diseases,

22 NIH, Rockville, MD 20852

23  
24 3: Equal Contribution  
25  
26

27

28

29 **Abstract**

30 Attaining migratory fate from a stationary cell population is complex and indispensable  
31 both for the multicellular organism development as well for the pathological condition  
32 like tumor metastasis. Though widely prevalent in the metazoans, the molecular  
33 understanding of this phenomenon remains elusive. Specification of migratory border  
34 cells from the follicular epithelium during *Drosophila* oogenesis has emerged as one  
35 of the excellent model systems to study how motile cell are specified. JAK-STAT  
36 activation in 6-10 anterior most follicle cells of the *Drosophila* egg chamber transforms  
37 them to a migratory cluster called the border cells. We show that a nurse cell protein,  
38 Cup, non-cell autonomously restricts the domain of JAK-STAT activation in the  
39 anterior follicle cells. Further examination suggests that Cup functions through  
40 Rab11GTPase to regulate Delta trafficking in the nurse cells potentiating Notch  
41 activation in the anterior follicle cells. Since Notch activity in the follicle cells modulates  
42 the JAK-STAT, any perturbation in Notch activation affects the border cell fate.  
43 Altogether, we propose that germline Cup affects the border cell fate through  
44 appropriate activation of Notch and JAK-STAT signaling in the follicle cells.

45

46 **Keywords:** *Drosophila* Cup, border cell specification, nurse cell, JAK-STAT, Notch  
47 signaling, non-cell autonomous, cytoskeleton, Recycling endosome

48

49

50

## 51 **Introduction**

52           Acquisition of migratory fate from a stationary epithelium not only plays an  
53 important role in aiding normal metazoan development but is also linked to various  
54 pathological conditions including tumor cell metastasis. (Ciruna and Rossant 2001;  
55 Jiang et al. 2013; Perrimon, Pitsouli, and Shilo 2012). Unfortunately, unwarranted  
56 specification of migratory cells from solid tumours is one of the leading causes of  
57 fatality associated with cancer metastasis (Friedl and Gilmour 2009; Naora and  
58 Montell 2005; Rørth 2009; Thiery et al. 2009). Although cells employ diverse  
59 mechanisms to acquire migratory fates, broadly they can be classified either under an  
60 autonomous or the regulative mode of specification (Davidson, Cameron, and Ransick  
61 1998; Edlund and Jessell 1999). Unlike autonomous mode, regulative communication  
62 dominates cell fate specification because of plethora of diverse cell-cell interactions  
63 possible in the metazoans. Since the transition of epithelial fate to mesenchymal fate  
64 is a prerequisite for growth, development, and survival, there is constant attempt to  
65 understand how migratory group of cells is delineated from their static progenitors in  
66 the multicellular organisms.

67           Border cells (BCs) in *Drosophila* oogenesis has emerged as an excellent  
68 genetic model system for studying how motile cells are specified from a stationary  
69 epithelium (Denise J Montell 2001). *Drosophila* oogenesis is a synchronised  
70 developmental process consisting of 14 stages of interconnected oval egg chambers  
71 (Bastock and St Johnston 2011; Spradling 1993). Each egg chamber harbours 16  
72 central germline cells, of which 1 takes the oocyte fate, while the rest acquires nurse  
73 cell identity that nourishes the growing oocyte (Horne-Badovinac and Bilder 2005;

74 Huynh and St Johnston 2004; Denise J. Montell 2003). Enveloping the germline cells  
75 is a single layer of approximately 750 follicle epithelial cells. A pair of specialized follicle  
76 cells called the polar cells mark each end of the egg chamber (Ruohola et al. 1991).  
77 The polar cells secrete cytokine, Unpaired (Upd) that activates JAK-STAT pathway  
78 and aids in specifying migratory fate to a select group of 4-6 anterior follicle cells  
79 (AFCs) (McGregor, Xi, and Harrison 2002; Silver and Montell 2001). This migratory  
80 group of AFCs that undergo partial Epithelial to Mesenchymal fate transition and  
81 initiate posterior movement towards the oocyte are the BCs (Denise J. Montell 2003).  
82 Activation of CEBP transcription factor, Slow border cells (Slbo), by JAK-STAT marks  
83 the fate of BCs (Beccari, Teixeira, and Rørth 2002; D J Montell, Rorth, and Spradling  
84 1992; Silver and Montell 2001). After the BCs are specified their posterior movement  
85 is guided through a gradient of growth factors (PVF1-Platelet Derived Growth Factor  
86 and Vascular Endothelial Growth Factor-related Factor 1 and Egf-Epidermal growth  
87 factor) secreted from the oocyte (P Duchek and Rorth 2001; Peter Duchek et al. 2001;  
88 McDonald 2003). Once the cluster reaches the oocyte boundary, it aids in the  
89 formation of a channel in the micropyle, which permits the sperm entry during  
90 fertilization (D J Montell, Rorth, and Spradling 1992). Any defect in BC specification/  
91 cluster formation or their efficient movement, impedes micropyle function, thus  
92 rendering the egg sterile.

93 The JAK-STAT signaling in the AFCs is strictly modulated at multiple steps to  
94 recruit an optimum number of FCs to BCs fate (generally 4-6 cells). At the primary  
95 level, both the production and the distribution of Upd ligand are regulated to form a  
96 gradient across the anterior follicle cells. Yorkie, a component of the Hippo signaling  
97 pathway negatively regulates Upd production from the polar cells (Lin et al. 2014). On  
98 the other hand, the Glypicans, Dally, and Dally-like shape the distribution of Upd

99 ligand, thus affecting STAT signaling and BC fate specification (Hayashi et al. 2012).  
100 Further within the AFCs, various intracellular components modulate STAT activity.  
101 Suppressor of Cytokine Signaling (SOCS36E) regulates ubiquitination of several  
102 components of the JAK-STAT pathway to limit STAT activation (Monahan and Starz-  
103 Gaiano 2015; Stec, Vidal, and Zeidler 2013). In addition, there are checkpoints at the  
104 transcriptional level too. In the follicle cells (FCs), antagonistic interactions between  
105 STAT and transcriptional repressor Apontic, restricts the domain of STAT activation,  
106 thereby limiting BC fate specification (Starz-Gaiano et al. 2008). A recent study shows  
107 that Insulin signaling limits BC fate by stabilising the negative regulator SOCS36E in  
108 the AFCs (Kang et al. 2018). Thus, the JAK-STAT pathway is regulated through  
109 multiple ways in the somatic FCs to limit BC fate during *Drosophila* oogenesis. Since  
110 interaction between germline nurse cells and somatic FCs is critical for oogenesis  
111 progression and polar cell fate specification, we were curious to examine if the  
112 germline cells have any direct role in modulation of BC specification (Assa-Kunik et al.  
113 2007).

114 In this study, we report a novel role of germline nurse cells in BC fate  
115 specification. Specifically, our data suggest that Cup protein, which expresses in the  
116 germline, non-cell autonomously modulates Notch signaling in the FCs. As Notch and  
117 JAK-STAT signaling are antagonistic, Cup mutants exhibit excess BC fate due to  
118 elevated STAT in the AFCs. Further, we demonstrate that Cup mutants exhibit  
119 disturbed actin cytoskeleton network and enrichment of Delta puncta in the nurse cell  
120 cytoplasm. Employing classical genetics and tissue immunohistochemistry in various  
121 genetic backgrounds, we propose that Cup maintains the germline cytoskeletal  
122 integrity and modulates Delta trafficking in the nurse cells. As we observe rescue in  
123 the BC numbers when constitutively active Rab11GTPase is overexpressed in the Cup

124 mutant germline, we propose that recycling Delta in the germline nurse cells is critical  
125 for Notch activation in the AFCs of vitellogenic egg chambers. Notch stimulation in the  
126 AFCs modulates STAT activity, thus controlling the number of AFCs that acquire BC  
127 fate.

128

## 129 **Results**

### 130 **Germline function of Cup affects the size of somatic BC cluster**

131 BC specification and migration is one of the critical factors that determine the fertility  
132 of the female flies. There are several autocrine, and paracrine factors associated with  
133 AFC that mediate specification of BCs. Though signals from the nurse cells regulate  
134 the polar and stalk cell fate in previtellogenic egg chambers (stage 1-2), it is not clear  
135 if the germline can directly impact the specification of BCs (López-Schier and St.  
136 Johnston, 2001a). Hence, we enquired if the germline nurse cells participate in the  
137 specification of somatic BCs during early vitellogenesis.

138 To address this question, we shortlisted 14 genes which are known to be  
139 expressed in the nurse cells and their mutants are reported to be female sterile. (Table  
140 S1). Among the 14 genes, we examined the status of BC fate specification in 3 mutant  
141 lines that were known to be homozygous viable. We evaluated the size of BC clusters  
142 in the respective homozygous mutant egg chambers with the premise that any  
143 alteration in BC fate would have a direct bearing on the cluster size. We measured the  
144 size of the BC cluster for each of the three homozygous mutant lines and found that  
145 mutation in the Cup gene (*cup*<sup>01355</sup>) resulted in the largest BC cluster  
146 (3073.40±127.59µm<sup>3</sup> SEM, n=32 clusters) compared to the WT (1373.33±54.86 µm<sup>3</sup>

147 SEM, n=31 clusters) (Fig. 1A-C). The description of the cluster size of other mutant  
148 lines is provided in Fig. S1A-D.

149 *cup*<sup>01355</sup> is a hypomorphic allele of the Cup gene that regulates the translation  
150 and stability of several maternal mRNAs including that of *oskar* and *nanos* during  
151 *Drosophila* oogenesis (Broyer, Monfort, and Wilhelm 2017; Nelson, Leidal, and  
152 Smibert 2004; Wilhelm et al. 2003) This allele has a *P-lacZ* insertion in the untranslated  
153 region of the first exon of the Cup gene and belongs to the least severe class of alleles,  
154 where the phenotype manifests during post vitellogenic stages  
155 of *Drosophila* oogenesis (Keyes and Spradling, 1997). This mutant was ideal for our  
156 analysis as all other approaches to down regulate Cup function in the germline stalled  
157 the egg chambers in early stages of oogenesis.

158 To test if the larger clusters observed in *cup*<sup>01355</sup> homozygotes were indeed due  
159 to the altered number of BCs, we stained the egg chambers with DAPI to quantify the  
160 number of BCs. Consistent with our expectation, we observed that the number of BCs  
161 in *cup*<sup>01355</sup> mutant egg chambers was higher ( $8.13 \pm 0.4$  SEM, n=22) compared to WT  
162 ( $6.41 \pm 0.13$  SEM, n=29) (Fig. 1D-F). This suggested that Cup probably modulates the  
163 number of border cells in the migrating cluster in developing egg chambers.

164

165

166

167

168

169

170

171

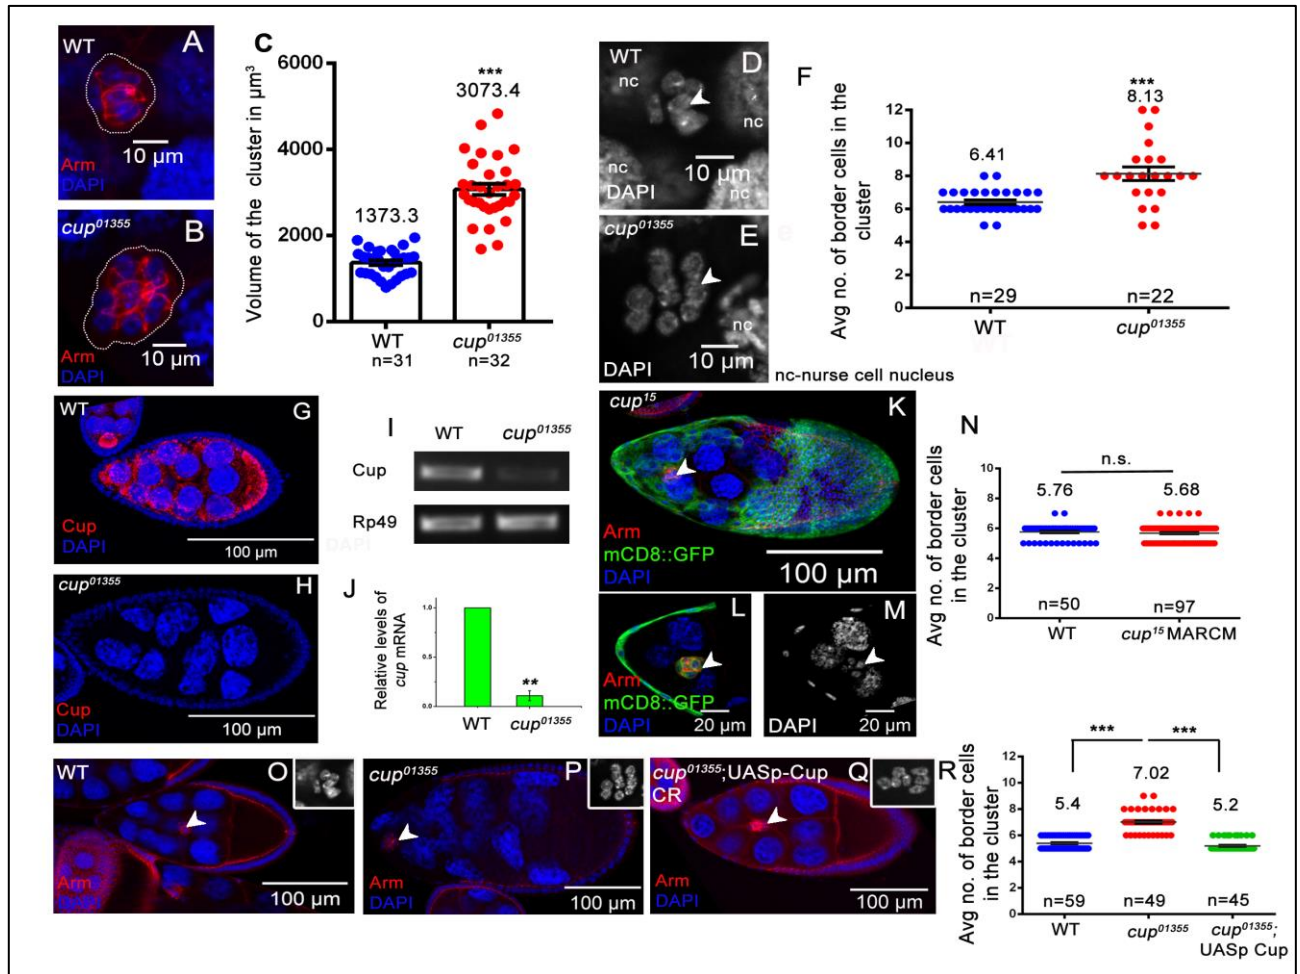

172

173

174 Since *cup*<sup>01355</sup> mutants egg chambers include both germline and somatic FCs, we

175 were curious to know in which cells was the Cup protein indeed functioning that was

176 modulating border cell fate in AFCs. We immunostained the egg chambers with an



177 anti-Cup antibody and observed that Cup is highly expressed in the cytoplasm of the  
178 germline cells both in the early and late stages of oogenesis. Consistent with previous  
179 published reports, we failed to detect any Cup protein in the somatic FCs (Keyes and  
180 Spradling, 1997). Since *cup*<sup>01355</sup> is a hypomorphic allele, we examined the levels of  
181 Cup transcript and protein in *cup*<sup>01355</sup> ovaries. Though we observed reduced levels  
182 of *cup* transcript (1/10th of wild type), we failed to detect any Cup protein in the  
183 *cup*<sup>01355</sup> egg chambers (Fig. 1G-J). The expression analysis of Cup gene product in  
184 WT and *cup*<sup>01355</sup> egg chambers suggested that Cup is primarily a germline protein and  
185 probably non-cell autonomously affecting BC fate in the FCs. To further confirm this,  
186 we employed Mosaic Analysis with a Repressible Cell Marker (MARCM) technique to  
187 generate homozygous mutant Cup FCs using a stronger allele of Cup (*cup*<sup>15</sup>) and  
188 examined the status of BC fate specification (Lee and Luo, 2001). *cup*<sup>15</sup> is an EMS  
189 allele, and mutant ovaries are known to exhibit a negligible amount of Cup protein as  
190 compared to WT (Keyes and Spradling, 1997). As expected, we didn't observe any  
191 significant difference in BC numbers specified in *cup*<sup>15</sup> mutant AFCs (5.68±0.06 SEM,  
192 n=97) compared to WT AFCs (5.76±0.07 SEM, n=50) (Fig. 1K-N). Further, we  
193 downregulated Cup function by generating flip-out clones expressing *cup* RNAi  
194 spanning the entire AFCs with at least 4 BC clones and quantified the number of BCs  
195 (Menon et al., 2015). Similar to our MARCM analysis, we did not observe any alteration  
196 in BC specification due to *cup* RNAi overexpression (5.4±0.08 SEM, n=50) compared  
197 to control (5.45±0.08 SEM, n=51) (Fig. S1E-H). We also downregulated Cup function  
198 in BC precursor FCs by expressing *cup* RNAi employing *c306*-GAL4 driver and  
199 observed no difference in BC numbers (5.25±0.05 SEM, n=76) compared to in  
200 observed control egg chambers (5.26±0.05 SEM, n=75) (Fig. S1I-K). Finally, to  
201 validate that the increased BC number is indeed due to the absence of Cup in the

202 nurse cells, we restored Cup expression by expressing the Cup-coding region (Cup-  
203 CR) in *cup*<sup>01355</sup> nurse cells using *nos.NGT* GAL4. Upon reconstitution of Cup-CR  
204 in *cup*<sup>01355</sup> nurse cells, the BC number was significantly restored close to that of the  
205 WT(*cup*<sup>01355</sup>-7.02±0.11SEM, rescue-5.2±0.06 SEM, wild type-5.4±0.06 SEM, n≥45  
206 egg chambers) (Fig. 1O-R).

207 Altogether our results above suggest that we have identified a nurse cell protein,  
208 Cup, which non-cell autonomously modulates the size of BC cluster specified from the  
209 overlying somatic FCs.

210

## 211 **Cup controls BC fate by negatively regulating the JAK-STAT pathway**

212 Since *cup*<sup>01355</sup> mutant egg chambers exhibit more nuclei in the migrating cluster,  
213 we investigated if the extra cells were indeed BCs. To check this, we stained the egg  
214 chambers with the Slbo antibody, which conspicuously marks the BCs. We observed  
215 significantly higher number of Slbo positive cells in the cluster (7.04±0.19 SEM, n=23)  
216 in *cup*<sup>01355</sup> egg compared to the WT (5.27±0.11SEM, n=22) (Fig. 2A-C). This suggests  
217 that Cup mutation results in aberrant specification of BCs from the follicular epithelium.  
218 To rule out the possibility that an increase in BC numbers is due to altered  
219 endoreplication of FCs, we compared the expression pattern of endoreplication  
220 markers Cut and phospho Histone 3 (pH3) between the WT and *cup*<sup>01355</sup> egg  
221 chambers (López-Schier and St. Johnston, 2001; Sun, 2005). We examined 170 egg  
222 chambers each of WT, and *cup*<sup>01355</sup> and observed no difference in staining pattern for  
223 Cut (Fig. S2A-H). We didn't observe any pH3 positive cells in stage 8, or later egg  
224 chambers in 168 samples analyzed each for WT and *cup*<sup>01355</sup> (Fig. S2I-L"). As the  
225 expression pattern of both Cut and pH3 was similar in both the WT and

226 the *cup*<sup>01355</sup> egg chambers, we excluded the possibility of altered endoreplication  
 227 being the cause of excessive BC fate in the Cup mutants.

228 Since JAK-STAT signaling activates *Sibo* expression in the AFCs, we next  
 229 examined if the increase in the number of BCs was linked to enhanced STAT function  
 230 (Beccari et al., 2002; Silver and Montell, 2001). Nuclear STAT is used as a molecular  
 231 reporter for assessing the status of JAK-STAT signaling (Darnell et al., 1994). To  
 232 measure STAT activity, we quantified nuclear STAT in WT and *cup*<sup>01355</sup> mutant AFCs.  
 233 Unlike WT (50.32±3.36 SEM, n=17), we observed higher levels (1.64-fold) of STAT  
 234 in *cup*<sup>01355</sup> mutant FCs (82.91±7.76 SEM, n=17 egg chambers) (Fig. 2D-F). Also, we  
 235 observed that the number of AFCs exhibiting distinct nuclear STAT in *cup*<sup>01355</sup> egg  
 236 chambers (15.12±0.67 SEM, n=16) was higher compared to WT (9.41±0.47 SEM,  
 237 n=17) (Fig. 2G). In addition, we observed conspicuous nuclear STAT staining  
 238 extending as far as 6th FC from the polar cell in *cup*<sup>01355</sup> egg chambers compared to

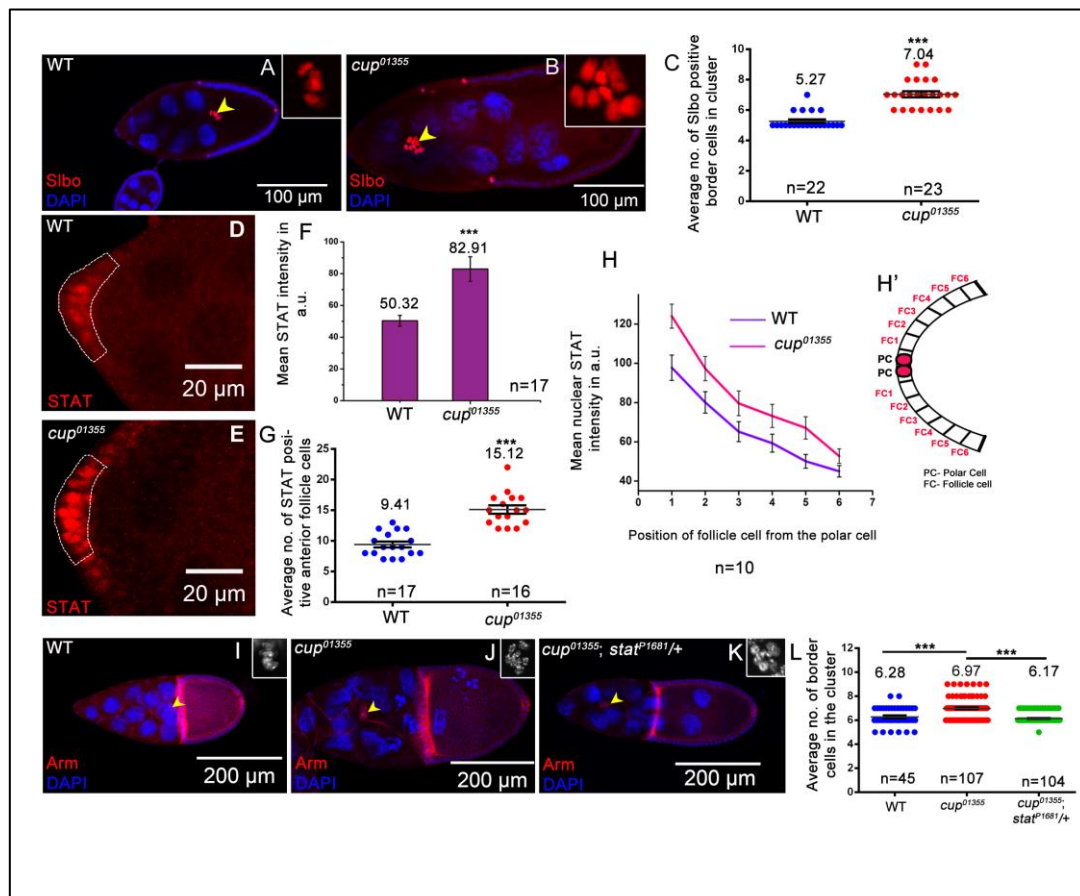

**Figure 2. Cup controls BC fate by negatively regulating the JAK-STAT pathway.**

(A-C) *cup*<sup>01355</sup> egg chambers exhibit increased Slbo positive cells (yellow arrow), Slbo (red), DAPI (blue), compared to wild type.

(D-G) *C*egg chambers exhibit higher STAT levels and more STAT positive cells in anterior end of egg chamber (dotted area), STAT (red) as compared to wild type.

(H-H') STAT level is higher in 6<sup>th</sup> FC from polar cell in *cup*<sup>01355</sup> egg chambers as compared to control.

(I-L) Higher BC numbers in *cup*<sup>01355</sup> is rescued when *stat*<sup>P1681/+</sup> background is introduced (yellow arrows), Armadillo (red), DAPI (blue, inset grey).

239 3 cells observed in the control (Fig. 2H-H'). These results suggest that both the levels  
240 and domain of STAT activation is enhanced in *cup*<sup>01355</sup> egg chambers. We then  
241 investigated if the elevated STAT was indeed responsible for excess BCs observed  
242 in the *cup*<sup>01355</sup> egg chambers. To test, this we compared BC numbers in *cup*<sup>01355</sup> egg  
243 chambers in WT and STAT heterozygous background (*stat*<sup>P1681/+</sup>). We observed BC  
244 number in the *cup*<sup>01355</sup> cluster was reduced in STAT heterozygous background than  
245 the Wild type (*cup*<sup>01355</sup>-6.97±0.077 SEM, *cup*<sup>01355</sup>; *stat*<sup>P1681</sup> /+ -6.17±0.03 SEM, wild  
246 type-6.28±0.11 SEM, n≥45 egg chambers) suggesting that elevated STAT is  
247 responsible for excess BC fate in the *cup*<sup>01355</sup> egg chambers (Fig. 2I-L). Given that  
248 higher STAT levels resulted excessive BC fate, we were eager to check as to how  
249 STAT function is elevated in *cup*<sup>01355</sup> FCs.

250 **Loss of Cup reduces Notch signaling, which leads to increased JAK-STAT**  
251 **activation.**

252 JAK-STAT signaling in the AFCs is positively regulated by the Upd ligand produced  
253 by the anterior polar cells (McGregor et al., 2002; Silver and Montell, 2001). Since we  
254 detected increased JAK-STAT signaling in the Cup mutant FCs, we examined if this  
255 was due to increase number of ligands producing polar cells. For this, we checked the  
256 pattern of Fasciclin III (FasIII), the lateral membrane protein that marks the junction

257 between two polar cells (Ruohola et al., 1991). Like the wild type, we observed a single  
258 distinct junction of polar cells labelled by FasIII at the anterior and posterior ends in  
259 the *cup*<sup>01355</sup> egg chambers suggesting normal number of polar cells (Fig. S3A-B). We  
260 also observed similar FasIII expression in early stages of oogenesis in both WT  
261 and *cup*<sup>01355</sup> egg chambers indicating that polar cell fate is unaffected in  
262 the *cup*<sup>01355</sup> hypomorphic background (Fig. S3C-J'). Given that the polar cell number  
263 is unaltered, we tested if enhanced JAK-STAT signaling was due to transcriptional  
264 upregulation of the *upd* gene itself. To examine this, we measured the expression  
265 of the *upd* reporter construct, *upd-lacZ* and observed no significant difference in the  
266 intensity of  $\beta$ -gal antibody staining from *upd-lacZ* between the WT (118.69 $\pm$ 7.02 SEM,  
267 n=20) and the *cup*<sup>01355</sup> stage 8 egg chambers (124.73 $\pm$ 11.03 SEM, n=20). This  
268 suggested against our premise that Upd gene expression was elevated in the  
269 *cup*<sup>01355</sup> egg chambers (Fig. S3K-M). A similar conclusion was made when  $\beta$ -gal  
270 antibody staining intensity was compared between the WT and the *cup*<sup>01355</sup> egg  
271 chambers in earlier stages of oogenesis (Fig. S3N-V). Altogether these results suggest  
272 that excess border cell fate observed in *cup*<sup>01355</sup> egg chambers is probably not due to  
273 alteration in the polar cell fate nor due to excessive transcriptional output from the Upd  
274 gene. This prompted us to explore the possibility of Cup modulating function of other  
275 JAK-STAT regulators that may, in turn, affect BC specification. One possible  
276 explanation for the upregulated STAT activity could be due to the downregulation of  
277 some of the negative regulators of the JAK-STAT signaling pathway in  
278 the *cup*<sup>01355</sup> egg chambers. There are several negative regulators of the JAK-STAT  
279 signaling including Protein tyrosine phosphatase 61F (Ptp61f), Brahma (Brm),  
280 Suppressor of Cytokine Signaling 36E (SOCS36E), and Notch (Assa-Kunik et al.,  
281 2007; Liu et al., 2010; Saadin and Starz-Gaiano, 2016). Among these molecules, we

282 narrowed down to Notch primarily because of two reasons. The seat of Cup  
283 expression, the germline nurse cells is known to communicate with FCs via Notch  
284 signaling at several stages to permit egg chamber development. Secondly, the Notch  
285 signaling has been shown to act antagonistically to JAK-STAT signaling in a context-  
286 specific manner in the FCs (Assa-Kunik et al., 2007; López-Schier and St. Johnston,  
287 2001a). Since we observed an upregulation of STAT function in the AFCs  
288 of *cup*<sup>01355</sup> egg chambers, we examined the level of Notch signaling in the FCs. For  
289 this we employed the Notch reporter construct where Notch Response Element (NRE)  
290 is tagged upstream of EGFP (NRE-EGFP). NRE comprises of binding sites for the  
291 Notch target, Suppressor of Hairless, and the transcriptional activator Grainy head  
292 (Zacharioudaki and Bray, 2014). Activation of Notch signaling leads to the binding of  
293 these transcriptional activators to the NRE sequence and results in GFP expression.  
294 We checked Notch activity in AFCs by measuring EGFP reporter expression (under  
295 NRE) in both WT and *cup*<sup>01355</sup> stage 8 egg chambers. Interestingly, we observed  
296 significantly lower levels of EGFP in the AFCs in *cup*<sup>01355</sup> egg chambers (6.29±0.38  
297 SEM, n=20) compared to the WT (26.93±2.18 SEM, n=20) (Fig. 3A-C) suggesting that  
298 Notch signaling is severely compromised in the AFCs of *cup*<sup>01355</sup> egg chambers. To  
299 further support our observation with NRE-GFP, we examined the levels and  
300 distribution of Notch in the FC. It is known that ligand binding stimulates two sequential  
301 proteolytic cleavages in the Notch receptor generating a fragment with extracellular  
302 domain (NECD) and the other with intracellular domain (NICD) (Bray 2006) . The  
303 distribution of NICD and NECD is routinely used to evaluate the status of Notch  
304 signaling. Ligand stimulation, promotes NECD and NICD internalization in the ligand  
305 producing cell and signal receiving cell respectively(Kopan and Ilagan 2009; Kovall et  
306 al. 2017; Nichols, Miyamoto, and Weinmaster 2007). We observed numerous NICD

307 and NECD puncta in the wild type FC and Nurse cells respectively (Fig 3D-J). The  
308 presence of large number of NICD and NECD puncta suggests that Notch signaling is  
309 active in the wild type FCs. On the contrary, we observed very few internalized puncta  
310 of both NICD and NECD in the FC and the nurse cell of the Cup mutant egg chambers  
311 respectively supporting the fact the Notch signaling is downregulated (For NICD; WT-  
312  $101 \pm 8.32$  SEM  $n=10$ , *cup*<sup>01355</sup>- $64.10 \pm 3.345$  SEM  $n=10$  and For NECD WT-  
313  $271.9 \pm 24.18$  SEM  $n=11$ , *cup*<sup>01355</sup>- $103.4 \pm 15.30$  SEM  $n=11$ ). (Fig 3I,J).

314 Since Notch signaling was lower in *cup*<sup>01355</sup> egg chambers, we speculated if this  
315 condition caused excessive BC fate observed in the genotype of our interest. To test  
316 this possibility, we first down regulated Notch signaling in the AFCs. As Notch signaling  
317 is required in early oogenesis, conditional over expression of dominant negative  
318 Kuzbanian was carried out by *sibo*-GAL4 at 29°C to downregulate Notch signaling in  
319 stage 8 AFC just when BC fate is determined. Kuzbanian is a disintegrin  
320 metalloprotease that cleaves and releases the NICD fragment, thus activating Notch  
321 receptor (Lieber et al., 2002; Qi et al., 1999; Wang et al., 2006). In the dominant  
322 negative Kuz construct, the Pro-domain and metalloprotease domain are deleted  
323 impeding the Notch activation. As per our expectation, we observed slightly higher  
324 number of BCs in the egg chambers over expressing the DN KUZ ( $5.98 \pm 0.069$  SEM,  
325  $n=100$ ) over the control samples ( $4.49 \pm 0.072$  SEM,  $n=90$ ) (Fig 3K-M). This suggested  
326 that Notch activation in the follicle cells negatively affects the BC cell fate specification  
327 in developing eggs. After demonstrating that Notch signaling can indeed affect BC  
328 fate, we were curious to know if excessive BC fate observed in the Cup mutant could  
329 be rescued by restoring Notch activation. To test this, we introduced the gain of  
330 function mutation of Notch receptor, *Abruptex*<sup>Ax-16</sup> (in a heterozygous condition)  
331 (Kelley et al. 1987) in *cup*<sup>01355</sup> genetic background and examined if the number of BC

332 are restored to the normal levels. Indeed, it was the case, as we rescued in BC fate  
 333 specification when heterozygous  $N^{Ax16}$  allele was brought in Cup mutant background

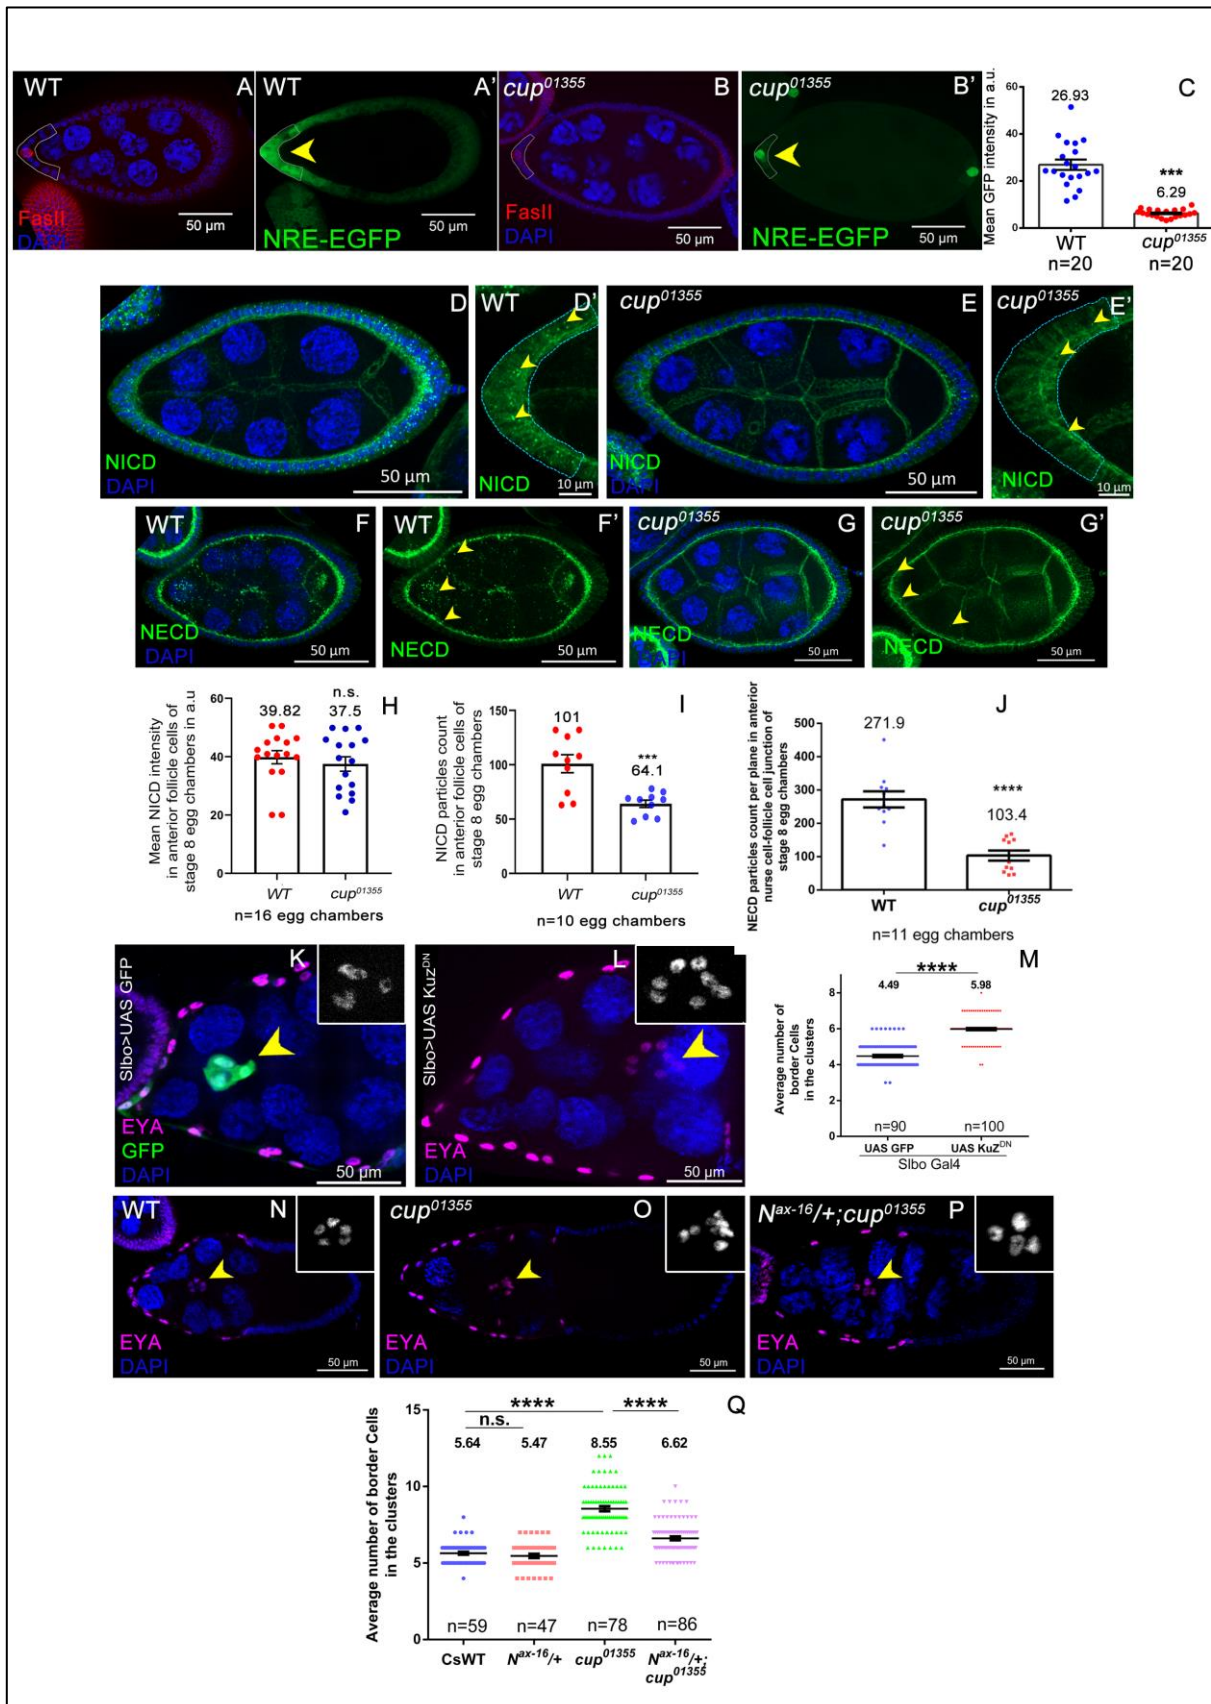



334

**Figure 3. Loss of Cup reduces Notch signaling, which leads to increased JAK-STAT signaling.**

(A-C) Intensity of NRE -EGFP (in green) is significantly decreased in stage 8. *cup*<sup>012355</sup> egg chambers marked by dotted white line; Depleted FASII staining indicates stage 8 egg chamber DAPI indicated in Blue.

(D-E') NICD stained egg-chambers exhibit reduced number of puncta (yellow arrow) in follicle cells in *cup*<sup>012355</sup> with respect to WT.

(H-I) Though mean intensity of NICD is not significantly different between *cup*<sup>012355</sup> and WT, the no of NICD puncta (yellow arrow) is reduced in anterior follicle cells in *cup*<sup>012355</sup> over WT.

(F-G') *cup*<sup>012355</sup> exhibits lesser number cytoplasmic NECD puncta (yellow arrow) with respect to Control

(K-M) Images of stage 9-10 egg chambers stained with Eya (in magenta) and DAPI(in blue)with indicated genotypes. Border cells (yellow arrow) express UAS mCD8GFP and UAS Kuz<sup>DN</sup> by *Slbo-GAL4*.

(J) Kuz<sup>DN</sup> over-expression increases Border cells number over Control.

(N-Q) Genetic interaction between Notch hyperactive allele (*N<sup>ax-16</sup>*) and *cup*. *N<sup>ax-16</sup>/+*; *cup*<sup>012355</sup>/*cup*<sup>012355</sup> gives partial rescue in BC number with respect to *cup*<sup>012355</sup>/*cup*<sup>012355</sup> Yellow arrow border cells, Eya stain labels all FC and BC nuclei

335 (6.616±0.1240 SEM, n=86) (Fig 3N-Q) compared to homozygous Cup mutant  
336 (8.551±0.1679 SEM, n=78). This supports our hypothesis that increased BC fate  
337 observed in the Cup genetic background is due to suppression of Notch signaling in  
338 the follicle cells. Taken together these results above suggest that Cup functions  
339 through Notch to modulate the number of AFC that acquire BC fate.

340 Decrease in levels of NICD and NECD is indicative of inefficient Notch  
341 proteolysis(Bland, Kimberly, and Rand 2003; Schroeter, Kisslinger, and Kopan 1998),  
342 Hence we next examined the status of Delta ligand to investigate the reason for  
343 reduced Notch signaling in the Cup mutant FCs.

344

## 345 **Cup regulates the nurse cell organization and Delta trafficking**

346 One of the primary reasons for examining Delta in the germline nurse cells was that  
347 we observed disorganized nurse cell morphology in the *cup*<sup>01355</sup> egg chambers. Unlike  
348 the normal round shape nurse nuclei in the WT, we observed elongated, mispositioned  
349 nurse cell nuclei in *cup*<sup>01355</sup> egg chambers (Fig 4A-B). Since mispositioned nurse cell  
350 nuclei has been reported under conditions of disorganized cytoskeleton (Cooley and  
351 Verheyen 2003). we examined the status of actin cytoskeleton in *cup*<sup>01355</sup> mutant egg  
352 chambers. We stained the egg chambers with rhodamine-phalloidin to label the F-  
353 actin fibers and observed complete absence of distinct actin fibers in the nurse cells  
354 of *cup*<sup>01355</sup> egg chambers unlike the control (Fig. 4C-C'). We expressed *cup* RNAi and  
355 measured phalloidin intensity in the nurse cells of early-stage egg chambers (< stage  
356 8) to monitor the effect of Cup on the nurse cell cytoskeleton. We observed significantly  
357 decreased phalloidin intensity in the Cup depleted early-stage egg chambers as  
358 compared to control. This suggested that Cup is important for maintaining the actin  
359 cytoskeleton in the early stages of oogenesis too (Fig. S4A-G). We also examined the  
360 microtubule network by staining *cup*<sup>01355</sup> egg chambers with a cocktail of  $\alpha$  &  $\beta$  -Tubulin  
361 antibody and observed that the microtubule framework is also completely disrupted.  
362 The tubules were shorter in length and randomly oriented in nurse cell cytoplasm  
363 in *cup*<sup>01355</sup> egg chambers ( $8.82 \pm 0.45$  SEM, n=95 fibers of 5 egg chambers) as  
364 compared to the control ( $18.05 \pm 0.47$  SEM, n=95 fibers of 5 egg chambers) (Fig. 4D-  
365 E). Since Cup plays a role in stabilizing mRNAs, we sought to check if actin and  $\alpha$ -  
366 tubulin mRNA levels are affected in Cup-depleted nurse cells (Broyer et al., 2017).  
367 qPCR of total RNA isolated from whole ovaries showed a 1.69 fold and 1.72 fold  
368 downregulation in the relative expression of Act5C and  $\alpha$ Tub84B respectively  
369 in *cup*<sup>01355</sup> egg chambers compared to WT (Fig. S4I). We analyzed the distribution of

370 different stages of the egg chamber in WT and *cup*<sup>01355</sup> ovaries by monitoring Cut  
371 protein expression, which is dynamic across the different stages of oogenesis  
372 (Jackson and Blochlinger, 1997). We did not observe any difference in the proportion  
373 of stages of egg chambers isolated from an equal number of WT and *cup*<sup>01355</sup> ovaries.  
374 (Fig. S4H). Thus, the difference observed in actin and tubulin mRNA levels is not due  
375 to skewed stage distribution in *cup*<sup>01355</sup> ovaries. Together the results above suggest  
376 that one of the reasons for the absence of proper nurse cell cytoskeleton in the Cup  
377 mutant egg chambers could be the reduced levels of respective transcripts. As  
378 cytoskeleton is critical for trafficking of Delta, the ligand for Notch receptor, we  
379 focussed our attention on Delta distribution in the germ line nurse cells (Meloty-Kapella  
380 et al., 2012.)

381 First, we compared the levels of total Delta protein between WT and *cup*<sup>01355</sup>  
382 egg chambers. Unlike our expectation, we did not observe any significant difference  
383 in the mean Delta intensity between WT (1810.22±97.63 SEM, n=9 egg chambers)  
384 and *cup*<sup>01355</sup> homozygous egg chambers (1614.43±105.29 SEM, n=9 egg chambers)  
385 (Fig. 4F-G',J). Nevertheless, the asymmetrical posterior localization of Delta protein in  
386 WT oocyte was absent in the *cup*<sup>01355</sup> mutant egg chambers (Fig 4F-G'). Strikingly,  
387 we observed a large number of conspicuous Delta puncta in the cytoplasm of nurse  
388 cells of *cup*<sup>01355</sup> mutant egg chambers (767± 20.51 SEM, n=9 egg chambers) over  
389 the Wild type egg chambers egg chambers (328.6±10.35 SEM, n=9 egg chambers)  
390 (Fig. 4F-G',L). In addition, we observed very few Delta puncta at the apical interface  
391 of AFC and germline nurse cells (control - 150.4± 4.68 SEM, n=5; *cup*<sup>01355</sup>-  
392 45.69±3.2225 SEM, n=5) (Fig 4H-I,K). Incidentally the anterior most FCs acquire the  
393 migratory border cell fate as oogenesis progresses. Delta being a transmembrane  
394 protein, it's enrichment in the cytoplasmic fraction of the Cup mutant egg chambers

395 and absence from apical interface of AFCs, suggested that Delta trafficking is probably  
 396 perturbed in the Cup mutants.. These results above suggests that Cup mutation  
 397 affects both the germline cytoskeleton and Delta trafficking in the developing egg  
 398 chambers.

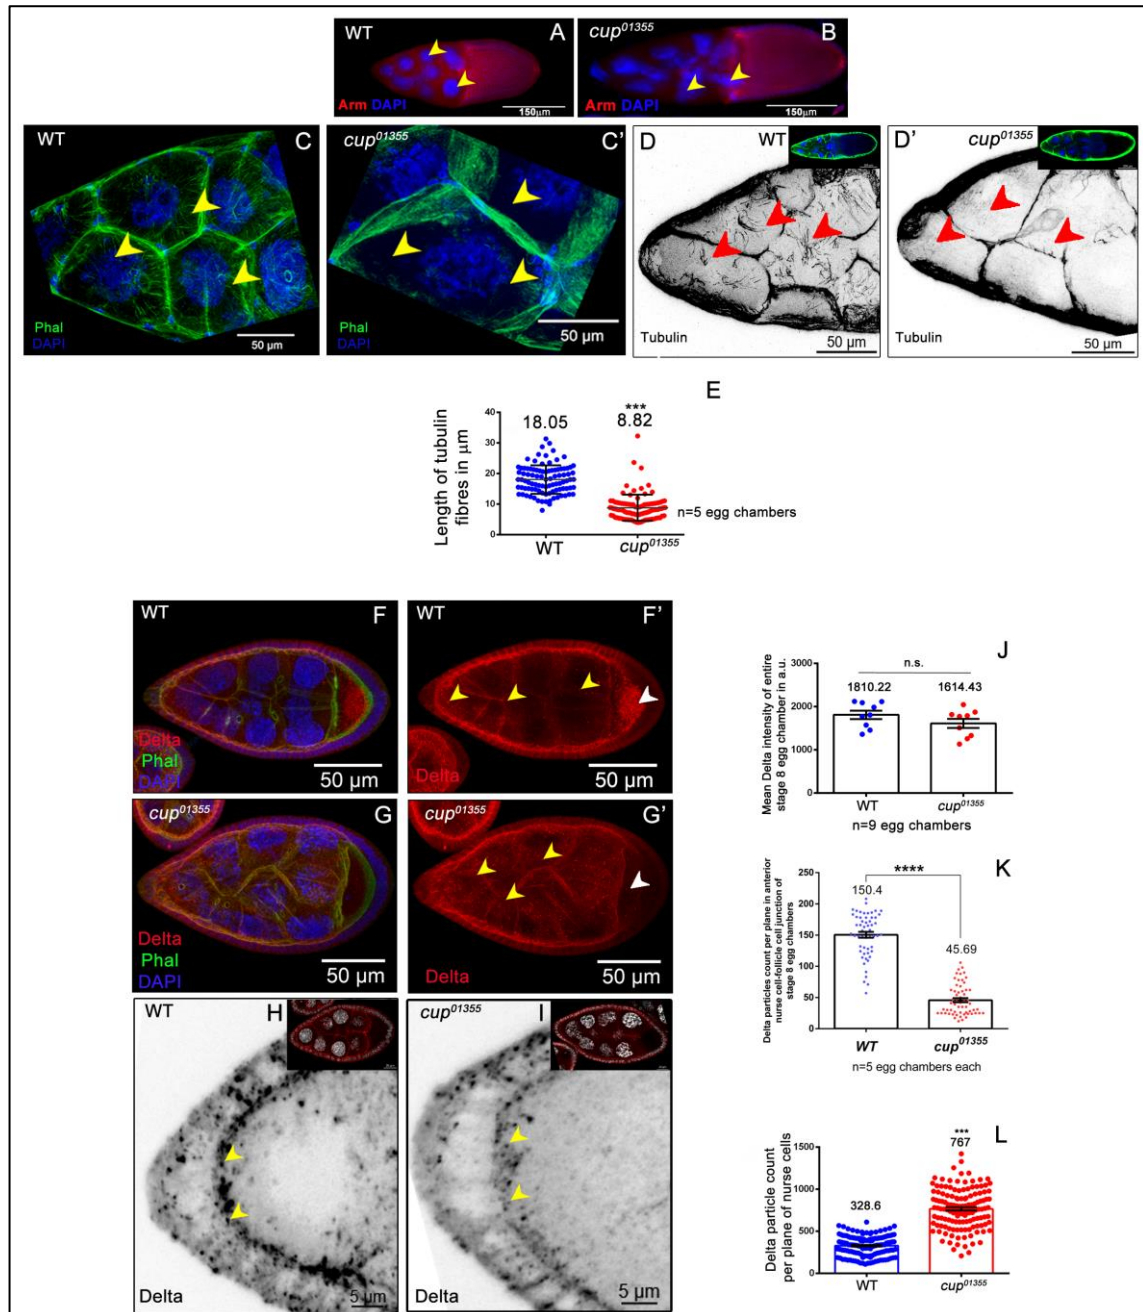

399

400 **Figure 4: Cup regulates nurse cell organisation which is crucial for Delta internalisation**  
 401 **and BC specification.**

402 (A-B) Nurse cell nuclear morphology is disrupted in *cup*<sup>01355</sup> egg chambers. Nuclei (yellow  
403 arrows) are elongated and mispositioned in *cup*<sup>01355</sup> egg chambers compared to round nuclei in  
404 wild type, Armadillo (red), DAPI (blue).

405 (C-C') Phalloidin staining of *cup*<sup>01355</sup> egg chambers show absence of distinct actin fibers  
406 (yellow arrows) as seen in wild type egg, Phalloidin (green), DAPI (blue).

407 (D-E) Tubulin stained *cup*<sup>01355</sup> egg chambers show smaller, randomly distributed tubulin fibres  
408 (Red arrows) in nurse cell cytoplasm compared to distinct radially arranged fibers in wild type,  
409 tubulin (Black), DAPI (blue). In inset tubulin is in Green.

410 (F-I) Delta stained *cup*<sup>01355</sup> egg chambers exhibit more cytoplasmic puncta in nurse cells as  
411 compared to wild type (yellow arrows). Oocyte Delta localisation is absent in *cup*<sup>01355</sup> egg  
412 chambers as observed in wild type (white arrow). Mean Delta intensity of wild type and *cup*<sup>01355</sup>  
413 egg chambers is similar, Delta (red), Phalloidin (green), DAPI (blue). Whereas delta puncta in  
414 nurse cell-anterior cell junction is reduced in *cup*<sup>01355</sup>/*cup*<sup>01355</sup> over WT.

415

416 As proper trafficking of Delta ligand in the nurse cells is critical for Notch activation  
417 (López-Schier and St. Johnston 2001), we were curious to examine which part of Delta  
418 trafficking pathway was affected in the Cup mutant egg chambers.

419

## 420 **Endocytosis of Delta is critical for proper BC specification**

421 Delta internalization by endocytosis in ligand-producing cells is important for  
422 activation of Notch signaling in the receptor producing cells (Langridge and Struhl,  
423 2017; Meloty-Kapella et al., 2012; Okano et al., 2016). As the observed Delta puncta  
424 in the nurse cells can be an outcome of defective endocytosis or exocytosis, we first  
425 examined the status of these two processes in the Cup mutant nurse cells. This was  
426 to investigate which component of the cellular trafficking was defective and resulting  
427 in Delta enrichment in the Cup mutant egg chambers. To test this, we carried *ex vivo*  
428 live endocytosis uptake assay on egg chambers with an antibody that recognizes the  
429 extracellular domain of Delta ligand (c594.4). In the live samples, c594.4 antibody can  
430 only bind the extracellular epitope of Delta as it is externally presented while the  
431 intracellular Delta fraction remains unlabelled. During chase, the labelled extracellular

432 epitope of Delta is internalized, moves through the endocytotic vesicles along with the  
433 ligand. Our rationale was that the enriched Delta puncta observed in the Cup mutant  
434 nurse cells will be labelled in the live endocytosis uptake assay if there are defects in  
435 endocytosis. While any shortcoming in exocytosis will defer recognition of cytoplasmic  
436 Delta by the c594.4 antibody in the Cup mutants in the above assay (Le Borgne and  
437 Schweisguth 2003; Giagtzoglou et al. 2012). When we conducted this experiment, we  
438 observed a conspicuous apical enrichment and a few randomly distributed cytoplasmic  
439 puncta of Delta in the follicle cells of both the wildtype and Cup mutant egg chambers.  
440 Strikingly unlike the WT, we observed significantly higher number of cytoplasmic Delta  
441 in the nurse cells of Cup mutant egg chambers as observed in fixed sample analysis  
442 (Delta particle count: WT-  $468.3 \pm 27.84$  SEM  $n=11$ , *cup*<sup>01355</sup>/*cup*<sup>01355</sup>-  $1104 \pm 60.88$   
443 SEM  $n=11$ )(Fig 5A-C). As the cytoplasmic Delta in the Cup mutant nurse cells was  
444 conspicuously labelled in the live endocytosis assay, it suggested that defects in Delta  
445 trafficking observed in the Cup mutants was predominantly due to impaired  
446 endocytosis. To cross check the above observation, we blocked endocytosis *per se* in  
447 the germline nurse cells and examined the distribution of Delta ligand. Auxilin (*hsc*<sup>70-  
448 4</sup>) is a J domain protein known to affect Delta endocytosis in the signaling sending cells  
449 (Chang et al., 2002; Jia et al., 2015). We down regulated *hsc*<sup>70-4</sup> function in the nurse  
450 cells by expressing *hsc*<sup>70-4</sup> RNAi with *mat* $\alpha$ -GAL4 driver and observed conspicuous  
451 enrichment of Delta puncta in the nurse cell cytoplasm resembling our previous  
452 observations with *cup*<sup>01355</sup> mutant egg chambers. This phenotype was also  
453 recapitulated when the function of master regulator of endocytosis, Rab5 GTPase  
454 (Bucci et al. 1992) was down regulated by RNAi in the nurse cells Fig. 5D-G). These  
455 observations support the fact that impaired endocytosis affects Delta trafficking in the  
456 nurse cells on similar lines as observed in our live endocytosis assay in Cup mutants.

457 Next, we explored the impact of blocking Delta endocytosis on BC fate specification.  
458 To do this we down regulated the function of Dynamin, which plays an important role  
459 in pinching off vesicles containing Delta-Notch complex in ligand-producing cells  
460 (Windler and Bilder, 2010). We expressed a dominant-negative temperature-sensitive  
461 allele of Shibire (*Drosophila* homolog of Dynamin) in the nurse cells using  
462 the *nos*.NGT GAL4 and assessed the BC fate (Kilman et al., 2009). We used GFP-  
463 Cnn as a control reporter to indicate germline expression of *nos*.NGT GAL4. We found  
464 that the downregulation of *Shi* activity in the nurse cells increases the number of BCs  
465 specified from the AFCs ( $6.29 \pm 0.14$  SEM, n=54) compared to the control ( $5.31 \pm 0.06$   
466 SEM, n=70) (Fig. 5H-J).

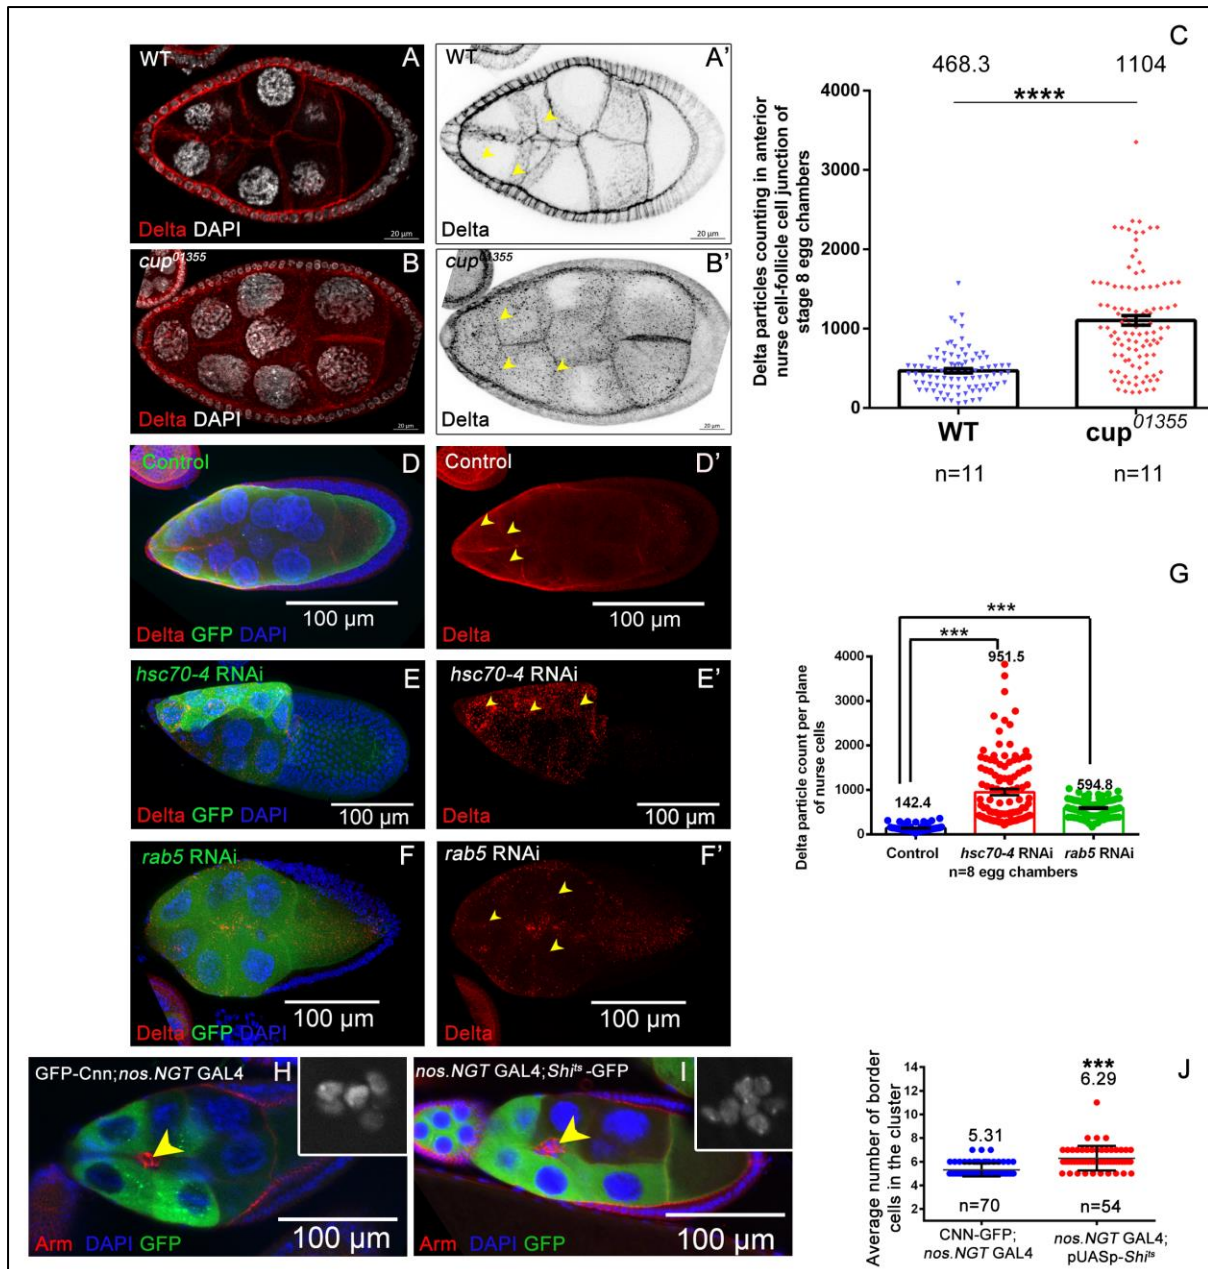

467

468 **Figure 5: Endocytosis of Delta is critical for proper BC specification.**

469 (A-C) live Delta internalization assay has shown that *cup*<sup>01355</sup> egg chambers exhibit more  
 470 cytoplasmic puncta (yellow arrows) in nurse cells as compared to wild type (yellow arrows),  
 471 Delta (red, black), DAPI (white).

472 (D-G) Expression of *hsc70-4* RNAi and *rab5* RNAi in nurse cells using *matα-tubulin* GAL4-  
 473 VP16 enriches Delta cytoplasmic puncta (yellow arrows), Delta (red), DAPI (blue), GFP  
 474 (green). Nurse cells expressing RNAi are indicated by *capu.GFP* reporter expression.

475 (H-J) Downregulation of endocytosis in nurse cells by expressing DN *Shi*<sup>ts</sup>-GFP increases BC  
 476 number (yellow arrow) compared to control, Armadillo (red), GFP (green), DAPI (blue, inset  
 477 grey).



478

479           Altogether our results above indicate that endocytosis of Delta ligand in germline  
480 nurse cells plays an important role in regulating the number of follicle cells acquiring  
481 the BC fate. Any instance wherein Delta internalization is altered, including Cup  
482 mutants, causes aberrant BC fate specification. Next, we were curious as to know how  
483 Cup function in the germline might affect Delta's internalization or endocytosis. One  
484 possibility could be that lower levels of actin and tubulin may affect the nurse cell  
485 cytoskeleton, thus impeding Delta trafficking and Notch activation in the follicle cells.  
486 However, over expression of actin and tubulin together or independently failed to  
487 rescue the BC fate in the Cup mutant egg chambers (Fig S4J). This suggests that the  
488 effect of Cup on the nurse cell cytoskeleton and Delta trafficking may be independent  
489 of each other.

490           Given that endocytic pathway of Delta ligand trafficking is perturbed, we further  
491 investigated to identify which component of endocytosis rescues the excessive BC  
492 fate observed in Cup mutant egg chambers.

493

#### 494 **Rab11 over expression in the Cup germline nurse cells limit BC fate**

495           Endocytosis is a multistep process where the internalized cargo moves to early  
496 endosomes, where the cargo is either recycled back to the plasma membrane or  
497 directed to late endosome enroute to degradation(Bonifacino and Rojas 2006; Futter  
498 et al. 1996; MacDonald, Savage, and Zech 2020; Ullrich et al. 1996). Rab5 GTPase  
499 plays a crucial role in biogenesis of endosome and aids in the maturation of early  
500 endosomes to late endosomes (Bucci et al. 1992) while Rab11 GTPase facilitates the  
501 recycling of the cargo from the early endosomes to the plasma membrane(Dollar et al.

2002; Pasqualato et al. 2004). The cargo that is marked for degradation moves from the late endosome to lysosome with the help of the activity of Rab7GTPase (Guerra and Bucci 2016). As our results suggest that Delta endocytosis machinery is defective, we were curious to know which aspect of endocytosis was impaired in Cup mutants. To investigate this, we overexpressed various constitutively active Rab GTPases (CA) in the nurse cells of the *cup<sup>01355</sup>/cup<sup>01355</sup>* egg chamber and examined if that could rescue the BC fate specification. The rationale for this experiment was activation of the impaired endocytotic arm in *cup<sup>01355</sup>/cup<sup>01355</sup>* nurse cells, should be able to rescue the border cells fate in the Cup mutants. We observed that overexpression of Rab11GTPase CA in the *cup<sup>01355</sup>/cup<sup>01355</sup>* nurse cells rescued number of BCs to the control levels (*cup<sup>01355</sup>*-8.36±0.081SEM, rescue-5.889±0.0.12 SEM, wild type-5.757±0.082SEM, n≥80 egg chambers) (Fig 6A-E, S5A). However, we didn't observe any significant difference in the BC numbers when Rab5GTPaseCA (8.260±0.1479) and Rab7GTPaseCA (8.913±0.1632) was over expressed in the *cup<sup>01355</sup>/cup<sup>01355</sup>* nurse cells (Fig 6E; S5D-G). This suggested that activating the recycling component of the endocytosis is able to restore the BC fate to near wild type numbers in the *cup<sup>01355</sup>/cup<sup>01355</sup>* mutant egg chambers suggesting recycling component of endocytosis in the germline nurse cells is critical for limiting the BC fate from the AFCs.

521

Finally, we tested if the rescue that we observed in BCs specification, due to the overactivation of Rab11GTPase was indeed due to the restoration of Notch signalling in the AFCs in *cup<sup>01355</sup>* egg chambers? For this, we measured Notch reporter activity by quantifying NRE-EGFP levels and consistent with our expectation, we observed a 0.5 fold upregulation of Notch activity when Rab11GTPase CA was overexpressed in

527 the nurse cells of *cup*<sup>01355</sup> egg chambers as compared to that of control (*cup*<sup>01355</sup>  
528 mutant egg chambers) (wild type- 1.00±0.05 SEM, n=13, *cup*<sup>01355</sup>- 0.16±0.028SEM,  
529 n=10, rescue- 0.52±0.040 SEM, n=16) (Fig 6F-I). We also observed rescue in the  
530 number of Delta puncta at the apical interface of AFC and germline cells of Cup  
531 depleted egg chambers that were over expressing Rab11CA (wild type- 164.3±3.125  
532 SEM, n=10, *cup*<sup>01355</sup>- 41.39±2.16SEM, n=10, rescue- 138.3±3.396 SEM, n=10) (Fig  
533 6J-M)

534 Over all our results suggest that stimulating the recycling endocytosis in the  
535 nurse cells of the *cup*<sup>01355</sup> egg chambers restores Notch signalling in the AFCs thus  
536 limiting JAK-STAT activation and restricting BC cell fate specification.

537 Altogether, our results suggest that interaction between germline nurse cells  
538 and overlying anterior follicle cells regulates the migratory fate of the border cells.  
539 Specifically, our data suggests that recycling of Delta ligand in germline nurse cells  
540 aids in Notch activation in the anterior follicle cells, thus restricting the domain of JAK-  
541 STAT signaling in the AFCs. In Cup mutants, Delta recycling is impeded, thus  
542 compromising Notch activation and resulting in excess JAK-STAT signaling and higher  
543 number of FCs acquiring migratory BC fate. Altogether, it appears that Cup protein  
544 modulates Delta ligand recycling in the germline cells, which aids in non-cell  
545 autonomous Notch activation in the AFCs. Once Notch is activated, it restricts JAK-  
546 STAT signalling in the FCs, thus optimising the number of cells acquiring BC fate. Our  
547 data thus provides a novel insight how the communication between germline and  
548 soma may regulate cell fate specification during development.

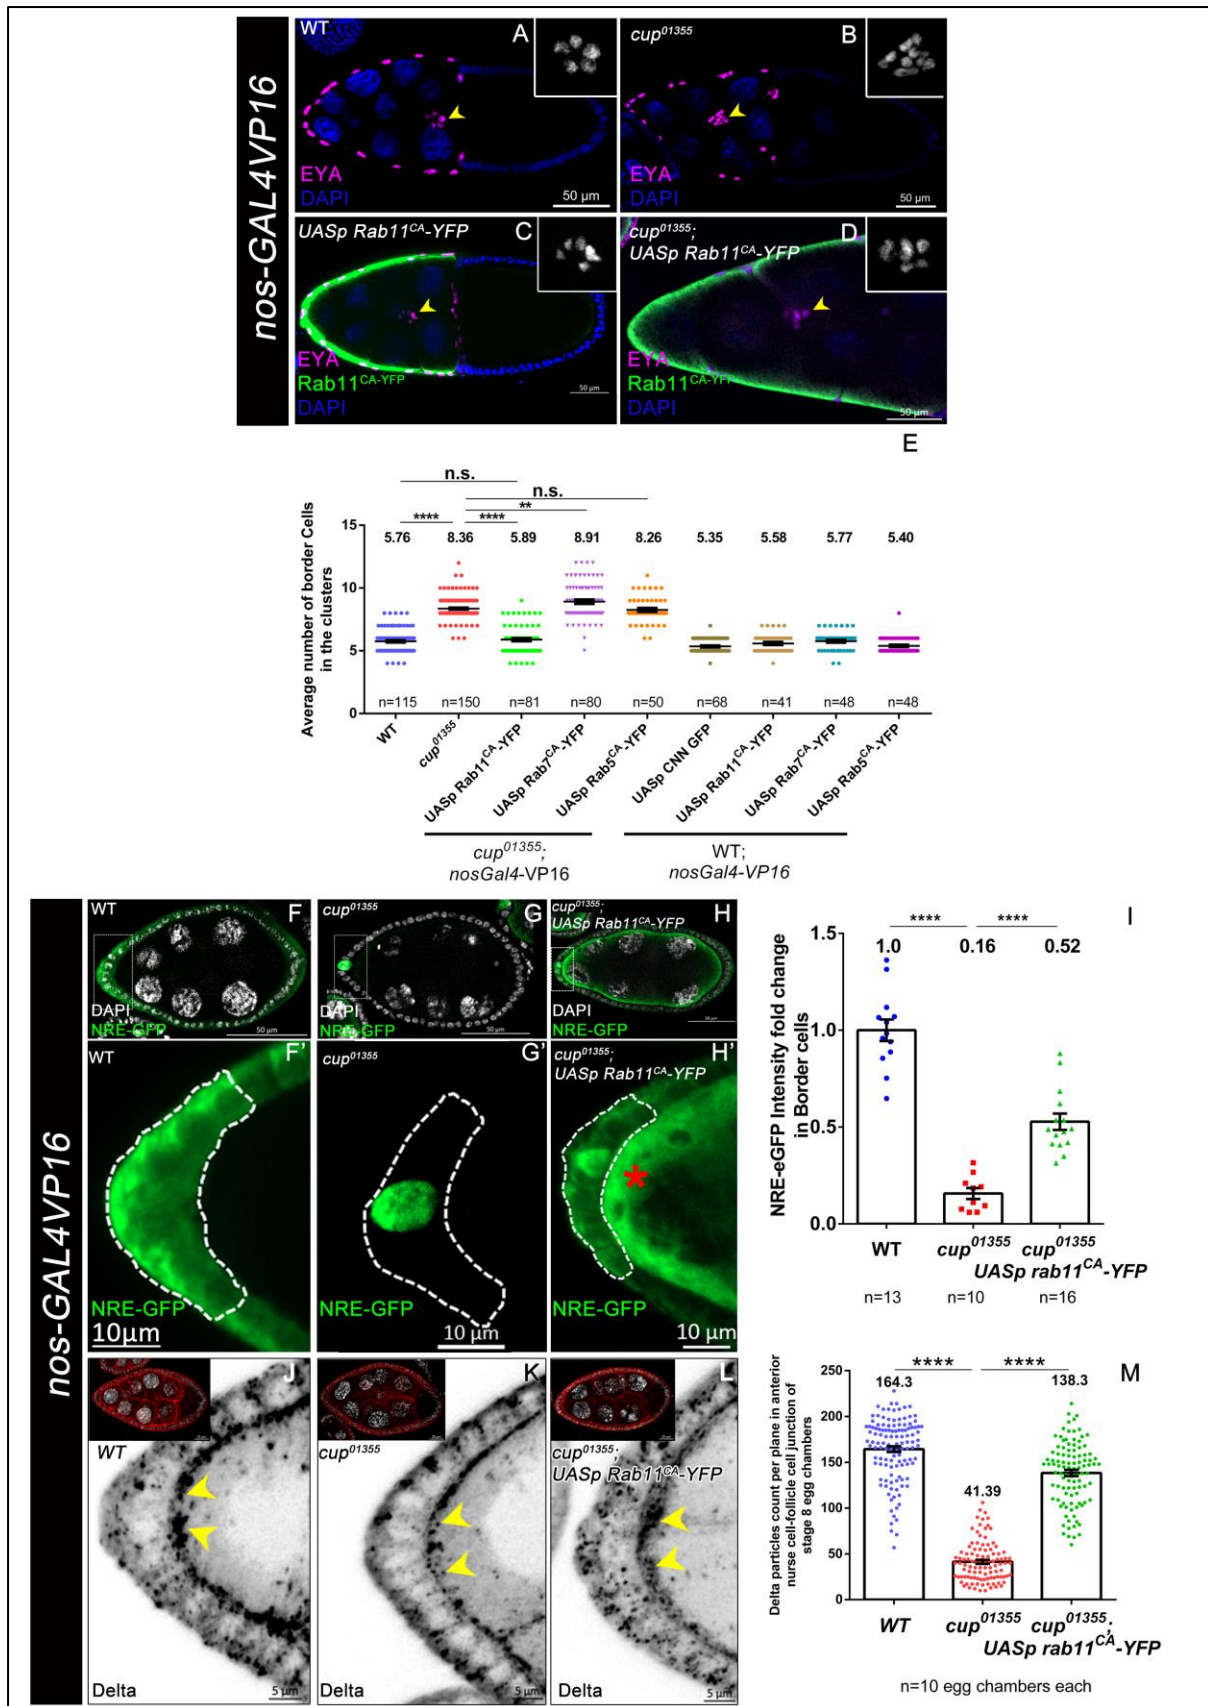

549

550

**Figure 6: Rab11 overexpression in the cup germline nurse cells limit BC fate**

**(A-E)** Stage 10 egg chambers of indicated genotypes stained with EYA in magenta, DAPI in blue, inset grey and YFP in green. yellow arrowheads mark the border cell cluster. No. of border cells are rescued when RAB11<sup>CA</sup> is overexpressed in nurse cells of *cup*<sup>01355</sup> egg chambers as compared to *cup*<sup>01355</sup> egg chambers.

**(F-I)** Stage 8 egg chambers of indicated genotypes. White dotted line outlines the AFCs that would be specified as future border BCs. NRE-EGFP expression is in green and DAPI in white. NRE-EGFP intensity fold change is partially rescued when Rab11<sup>CA</sup> is overexpressed in nurse cells of *cup*<sup>01355</sup> egg chambers as compared to *cup*<sup>01355</sup> egg chambers. Red asterisk in nurse cells indicates tagged YFP expression when Rab11<sup>CA</sup> is over expressed in germ line with germline specific *nos GAL4- VP16*.

**(J-M)** Stage 8 egg chambers of indicated genotypes. Yellow arrowheads mark the delta particle localization in anterior nurse cells-follicle cells junction. Delta expression in Red, black and DAPI in white. Number of delta particles in anterior nurse cells-follicle cells junction of stage 8 egg chambers are rescued when Rab11<sup>CA</sup> is overexpressed in nurse cells of *cup*<sup>01355</sup> egg chambers as compared to *cup*<sup>01355</sup> egg chambers.

551

552

553

554

555

556

557

558

559

560

561

562

563

564

565

566

567

568

569

570

571

572

573

574

575

576

577

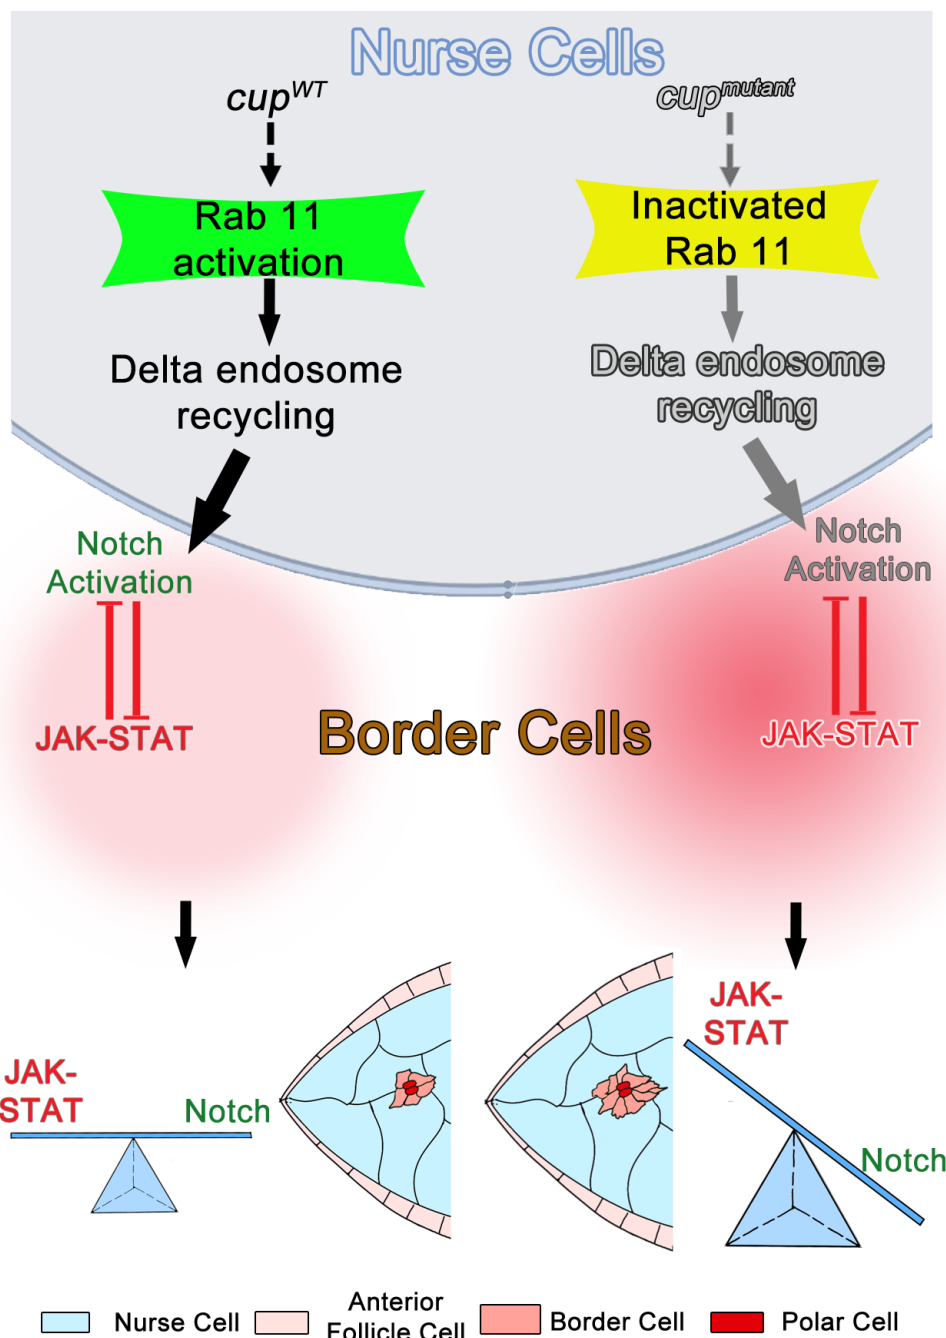

**Fig 7:** Cup function potentiates Delta recycling in the germline nurse cells. This stimulates non-cell autonomous activation of Notch signaling in the Anterior Follicle cells (AFCs). As Notch and JAK-STAT are antagonistic, a balance between these two signaling cascades aids in transformation of an optimum number of stationary AFCs to migratory border cell fate. In the Cup mutants, Notch signaling is impeded, which results in higher levels of STAT and larger number of AFCs acquiring migratory border cell fate.

578

579

## 580 **Discussion**

581 Cell fate specification is the fundamental basis for generating cellular diversity  
582 in developing metazoans. Out of diverse mechanisms, intercellular communication  
583 that delineates the migratory individuals in a stationary population plays an important  
584 role both in normal development and as well as in various diseased condition including  
585 tumour metastasis. Since cellular movement is critical for both normal and pathological  
586 events, we employed *Drosophila* oogenesis model to study how intercellular  
587 communication between germline and soma results in the specification of BCs from  
588 the anterior follicle cells. So far, we know that BC fate acquisition is under strict  
589 surveillance of signaling between the somatic FCs. We report a novel finding of how  
590 germline-soma interaction limits the size of the migratory BC cluster during *Drosophila*  
591 oogenesis. We show that RNA binding protein, Cup, maintains the nurse cell  
592 cytoskeleton and regulates Delta ligand trafficking in the germline cells thus facilitating  
593 Notch activation in AFCs. In the absence of Cup function, Notch signaling is  
594 hampered, leading to elevated STAT and excessive number of AFCs acquiring BC  
595 fate (Fig 7)

596 .

597 This study was aided by the presence of hypomorphic allele for Cup, which  
598 exhibited defect in mid oogenesis. Given that Cup gene plays an essential role in early  
599 oogenesis, presence of this allele in particular helped us to bypass the initial steps of  
600 Cup requirement and allowed us to examine the role of Cup protein in vitellogenic  
601 stages of oogenesis. This won't have been possible by using classical loss of function  
602 mutants of Cup or the Cup RNA interference constructs as both the methods stall the  
603 egg chambers in very early stages of development. In the broader context our study

604 highlights the importance of hypomorphic alleles for studying the temporal function of  
605 genes that exhibit pleiotropic effect in metazoan development.

606 Our work highlights how the local environment controls the acquisition of  
607 migratory cell fate from a stationary population and gives important insights into the  
608 regulation of Notch signaling in vitellogenic egg chambers. Though interaction  
609 between the germline and follicle cells have been reported to affect epithelial  
610 morphogenesis, this is the first report where germline protein Cup is being shown to  
611 non-cell autonomously limit BC fate by restricting Notch signaling in the AFCs. We  
612 hypothesize that this interaction probably aids in forming a migrating BC cluster that  
613 is just of the right size to efficiently carry the non-motile polar cells to the oocyte  
614 boundary for forming the functional micropyle. Besides, our work sheds light upon  
615 certain unconventional functions of the germline protein Cup during *Drosophila*  
616 oogenesis-

617 In context of how Cup limits border cell fate in the developing egg chambers?  
618 One possibility could be that Cup regulates the germline cytoskeleton which may  
619 indirectly affect the Delta trafficking, thus affecting BC fate. However, we don't believe  
620 it be the case, as overexpression of Actin and Tubulin in the Cup mutant nurse cells  
621 failed to reduce the excessive BCs observed in Cup mutants egg chambers. Thus, we  
622 believe that effect of Cup function on the nurse cells cytoskeleton and on the BC fate  
623 are independent of each other. Coupling our results with all the available data on Cup,  
624 it appears that Cup performs diverse function in the nurse cells ranging from affecting  
625 cytoskeleton stability, regulating the output from maternal mRNAs to modulating Delta  
626 trafficking. Thus, it will be worth examining how Cup affects diverse function in the  
627 developing germline cells and is there any common overlapping mechanism between  
628 these assorted outputs.



629           Over all we learn that Notch signaling is also required in the mid oogenesis and  
630 our data suggests that recycling of Delta is critical for Notch activation. This is  
631 significant because there are two proposed models that suggests how Delta trafficking  
632 aids in Notch activation in the adjacent cells. The first model suggests that the pulling  
633 force generated by Delta – Notch endocytosis in the ligand producing cell facilitates  
634 S2 cleavage of Notch receptor, thus activating Notch signaling in the signal receiving  
635 cells. While the alternate model proposes that Delta endocytosis coupled with  
636 recycling facilitates Delta interaction with Notch receptor thus activating Notch  
637 signaling in the receptor producing cells(Bray 2006). In our study, activating recycling  
638 component of endocytosis in the germline nurse cells restored Notch signaling and  
639 reduced the excessive specification of BCs from the Cup mutant follicle cells. Thus,  
640 our data supports the Delta recycling model in the germline nurse cells for activation  
641 of Notch signalling in the neighbouring anterior follicle cells during mid oogenesis. Next  
642 pertinent question is how Cup is affecting the Rab11GTPase to modulate BC fate from  
643 the AFCs? Though we lack complete molecular insight into this aspect, our results  
644 allude to that fact that Cup may be regulating the activity of Rab11GTPase rather than  
645 its levels *per se*. Our interpretation stems from the fact that over expression of  
646 constitutively active Rab11 GTPase exhibits much better effect in limiting excessive  
647 BC fate of Cup mutant than overexpression of wildtype copy of Rab11 GTPase (Fig  
648 SB-C, H). In future, it may be worth examining how Cup affect Rab11GTPase activity  
649 and it will be worth investigating the role of GEFs like Crag in the developing egg  
650 chambers.

651           Notch signaling is an evolutionary conserved pathway in the metazoans, which  
652 regulates several aspects of development including cell fate specification, migration,  
653 tumor survival by promoting angiogenesis, it would be worth examining if similar

654 modes of germline–soma communication exist in other systems too (Chigurupati et  
655 al. 2007; Shi et al. 2005).

656

## 657 **MATERIALS AND METHODS**

### 658 ***Drosophila* stocks and Crosses**

659 Fly stocks and crosses were maintained at 25 °C and were incubated at 29 °C during  
660 GAL4 based experiments. The cup alleles *cup*<sup>01355</sup> (BL-12218), *cup*<sup>15</sup> (BL-29718) were  
661 obtained from the Bloomington Stock Centre (BDSC). These two alleles have been  
662 characterised by Keyes and Spradling (Keyes & Spradling 1997). Western blot  
663 analysis of *cup*<sup>01355</sup> ovaries shows >50% reduction in Cup protein level as compared  
664 to wild type (Keyes & Spradling 1997). The *cup*<sup>15</sup> allele is stronger and has been  
665 generated by EMS mutagenesis. Western blot analysis of *cup*<sup>15</sup> ovaries shows a very  
666 negligible amount of Cup protein as compared to wild type (Keyes & Spradling 1997).

667 For expression Cup in the germline, pUASp-Cup expression transgenic fly line was  
668 generated at the Centre for Cellular And Molecular Platforms (C-CAMP) facility,  
669 Bangalore, India. Cup-CDS construct from the BDGP clone LD47924 (Berkeley  
670 *Drosophila* Genome Project), was cloned in the pUASp vector and the construct was  
671 used for microinjection. *nos.NGT* GAL4 {Bloomington Stock Center (BDSC 25751)}  
672 was used for expressing various transgenes in the germline. The *upd-lacZ* fly stock  
673 was a kind gift from Prof. Henry Sun. The stock is generated by inserting a P{lacW}  
674 2851 bp upstream of the 5' end of *upd1* (Tsai and Sun 2004). This construct acts as  
675 an enhancer trap reporter enzyme which also harbors a nuclear localisation signal.  
676 This expression of lacZ reflects the transcription based on the enhancer activity of the  
677 endogenous *upd1* gene. This construct does not reflect the translation status of Upd.

678 *cup* RNAi (BL-35406), *rab5* RNAi (BL-34832), *hsc70-4* RNAi (BL-34836], UAS Kuz  
679 DN (BL-6578) Notch response reporter line (BL-30727), N<sup>Ax-16</sup> (BL-52014), UASp  
680 GFP-Cnn (BL-7255), UASp capu.GFP (BL-24763) UASp *rab11*-YFP (BL-9790), UASp  
681 *rab11*<sup>CA</sup>-YFP (BL-9791), UASp *rab5*<sup>CA</sup>-YFP (BL-9773), UASp *rab7*<sup>CA</sup>-YFP (BL-50785)  
682 were obtained from BDSC. *mata*-tubulin GAL4-VP16 (*mata*-GAL4) was gifted by  
683 Daniel St. Johnston. pUASp-Shi<sup>ts</sup> transgenic line was gifted by Richa Rikhy. For  
684 MARCM experiments the stock P{ry[+t7.2]=hsFLP}1, y[1] w[\*] P{w[+mC]=UAS-  
685 mCD8::GFP.L}Ptp4E[LL4]; P{w[+mC]=tubP-GAL80}LL10 P{ry[+t7.2]=neoFRT}40A;  
686 P{w[+mC]=tubP-GAL4}LL7 (BL-42725) was used to cross with *cup*<sup>15</sup> FRT 40A fly  
687 stock. BL-5192 was used to recombine FRT40A with *cup*<sup>15</sup> allele. Canton-S flies were  
688 used as wild type control flies.

689 For MARCM experiments 1-2 days old F1 flies were collected and incubated at  
690 37 °C for 1 hour, three times a day with a minimum two-hour interval in between the  
691 subsequent heat shocks. Heat shock was given for three consecutive days and flies  
692 were fattened at 25 °C after 5 days for 20-22 hrs and then dissected. *cup*<sup>15</sup> homozygous  
693 mutant follicle cell clones which spanned the entire anterior end of the egg chamber  
694 including the whole border cell cluster was used for quantification of the number of  
695 border cells in the cluster. For flip-out experiments, 1-2 days old F1 flies were collected  
696 and incubated at 37 °C for 30 minutes three times a day with a minimum two-hour  
697 interval. Heat shock was given for three consecutive days, followed by incubation at  
698 25 °C. After 4 days the flies were fattened at 29 °C for 20-22 hours and then dissected.  
699 Clones spanning >50% of the anterior follicle cells with minimum 3 border cell clones  
700 were analysed for quantification of number border cells in the cluster.

701 For GAL4 expression-based experiments, 2-3 days old flies were incubated at 29 °C  
702 for 22-24 hours followed by dissection. For mutant-based experiments, 2-3 days old  
703 flies were incubated at 25 °C for 22-24 hours followed by dissection.

704 For downregulation of Shibire, F1 flies bearing *Shi<sup>ts</sup>* expression construct were  
705 incubated at 31 °C (non-permissive temperature) for 20 hours followed by incubation  
706 at 29 °C for 18hours and then dissected.

707 For downregulation of Hsc70-4 in nurse cells with mata-GAL4, the flies were fattened  
708 at 25 °C for 20 hours followed by incubation at 29 °C for 6-7 hours and then dissected.

### 709 **Immunostaining**

710 Ovaries were dissected in Schneider's media containing 10% FBS (Foetal Bovine  
711 Serum, US origin, catalog no. 16000044) and fixed with 4% p-Formaldehyde (Sigma-  
712 Aldrich, catalog no. 158127) for 15 minutes at room temperature. Blocking was done  
713 with 1X PBS (Sigma-Aldrich, catalog no. P3813) containing 0.3% Triton X-100  
714 (Affymetrix, catalog no. T1001) and 5% BSA (Bovine Serum Albumin, Amresco,  
715 catalog no. 0332) for 1hour at room temperature. Mouse anti-Cup antibody was gifted  
716 by Prof. Akira Nakamura and used at 1: 10000 dilutions. Rat anti- Slbo antibody was  
717 gifted by Pernille Rorth and used at 1:500 dilutions. Rabbit anti-STAT was gifted by  
718 Steven Hou and used at 1:750 dilutions. Mouse anti- $\alpha$ -Tubulin antibody (T9026) was  
719 obtained from Sigma and used at 1:600 dilutions. Mouse anti-Armadillo (N27A1),  
720 mouse anti-Fas III (7G10), mouse anti-Delta (C594.9B), mouse anti-FasII (1D4),  
721 mouse anti-EYA (10H6) and mouse  $\beta$ -Gal (40-1a) were obtained from Developmental  
722 Studies Hybridoma Bank (DSHB) and used at 1:100, 1:500, 1:200 and 1:100 dilutions  
723 respectively. Phosho histone 3 antibody (Cell Signaling Technology, 9713S) was used  
724 at 1:150 dilutions. Rabbit anti-GFP (A-11122, Invitrogen) was used at 1:1500 dilutions.

725 Secondary antibodies conjugated with Alexa-488 and Alexa-568 (Molecular Probes)  
726 were used at 1:400 dilutions.

727 For Tubulin cocktail( $\alpha+\beta$ ) staining, Individual egg chambers were dissected in 1X PEM  
728 buffer (60mM PIPES, 25mM HEPES, 10mM EGTA, 4mM MgSO<sub>4</sub>, pH=6.8) and fixed  
729 with 10% formaldehyde in presence of 1X BRB80 buffer(Miao, Godt, and Montell  
730 2020) and 1% Tween 20 (Amresco). After fixation wash the sample with 1X PBS  
731 containing 1% Triton X-100 and 1X BRB80 buffer for overnight at 4°C. Blocking was  
732 done with 1X PBS (Sigma-Aldrich, catalog no. P3813) containing 1% Triton X-100  
733 (Affymetrix, catalog no. T1001) and 5% BSA (Bovine Serum Albumin, Amresco,  
734 catalog no. 0332) and 1X BRB80 buffer for 4 hours at room temperature. Mouse anti  
735 alpha-tubulin (T9026) was obtained from Sigma and used at 1:800 dilution and anti  
736 beta-tubulin (E7) was used at 1:200 dilution incubation in blocking solution for  
737 overnight at 4°C. Wash the sample with 1X PBS containing 0.5% Tween 20. Followed  
738 by secondary antibodies antibodies conjugated with Alexa-488 and Alexa-568  
739 (Molecular Probes) were used at 1:400 dilutions in blocking solution.

740

#### 741 **Measurement of the size of the border cell cluster**

742 For measuring the volume, completely detached border cell clusters at stage 9 that  
743 have not reached the oocyte boundary have been considered for analysis.

744 The border cell clusters are generally spheroid in structure. To measure the size of the  
745 cluster, the whole cluster was imaged at 40X magnification taking z stacks at optimal  
746 Z intervals suggested by the Zen 2012 software . The image processing and analysis  
747 were done using Zen 2012 software. All the stacks were merged together to obtain a  
748 2-dimensional maximum intensity projection (MIP) image. The cluster was outlined in

749 the MIP image, and the maximum and minimum diameter of the cluster was drawn,  
750 and the length obtained from the software was noted. The minor and major axes of  
751 the spheroid cluster were obtained by dividing the maximum and minimum diameters  
752 by 2 respectively. The Border cell cluster volume was obtained using the formula for  
753 spheroid ( $4/3\pi a^2b$ , where a is the major axis, and b is the minor axis. Images were  
754 acquired in Zeiss Axio observer 7 with Apotome.2 module.

755

### 756 **STAT intensity quantification**

757 To measure the STAT intensity, the anterior end of stage 8 egg chambers of  
758 wild type and *cup*<sup>01355</sup> egg chambers were imaged with center z section passing  
759 through the middle of the anterior polar cells. Z sections were captured at regular  
760 intervals for both the kinds of samples. The exposure time was kept identical for image  
761 acquisition in DAPI (7.2 ms) and Rhodamine channel (4s) (for STAT signal acquisition)  
762 for control and experiment samples. All the stacks were merged together to obtain a  
763 2-dimensional maximum intensity projection (MIP) image, and three nuclei on either  
764 side of anterior polar cells were outlined, and the mean STAT intensity was noted.  
765 Mean STAT intensity was calculated for each egg chamber. The average of Mean  
766 intensity for the control and experimental samples was determined and subsequently  
767 plotted with statistical tests.

768 Images were acquired in Zeiss Axio observer 7 with Apotome.2 module and analysed  
769 with Zen 2012 software.

770

### 771 **Notch Response Element GFP intensity calculation**

772 For measuring the NRE-GFP levels, the anterior end of stage 8 egg chambers were  
773 imaged keeping identical exposure time (GFP channel-400 ms) and other imaging  
774 parameters. Stage 8 was identified by depleted levels of Fas2 protein for both wild  
775 type and the mutants (Szafranski and Goode 2007). A single follicle cell layer above  
776 and below the polar cell containing layer was imaged taking z sections at regular  
777 intervals. The z-planes were merged together to obtain a 2D image, and four cells on  
778 either side of the polar cell along with the polar cells were outlined as the single region  
779 of interest in the anterior end of the egg chamber. The mean GFP intensity of the main  
780 body follicle cells (4 cells) was used for background correction. The mean of the  
781 corrected GFP intensity for the control and experimental egg chambers was plotted as  
782 fold change where we kept control as 1 with statistical tests. Images were acquired in  
783 Zeiss Axio observer 7 with Apotome.2 module and analysed with Zen 2012 software.

784

### 785 **Quantification of nuclei in the border cell cluster**

786 The nuclei were labeled using either anti-Slbo antibody or DAPI. The stage 9 or 10  
787 egg chambers, which had detached completely from the anterior end were considered  
788 for quantification. The number of border cell nuclei except the two polar cells were  
789 counted for every cluster, and the value was plotted. For counting Slbo positive cells,  
790 all the nuclei in the cluster, including the polar cells, were counted. In all other  
791 experiments, wherever DAPI or EYA was used to evaluate the number of border cells  
792 nuclei, the polar cells nuclei were excluded based on their smaller size.

793

794

### 795 **RNA isolation and qRT-PCR**

796 The RNA isolation was done from ovaries of adult flies using Trizol Reagent followed  
797 by cDNA preparation. Status of Cup transcript was evaluated by RT-PCR.

798 qPCR was done with SYBR Premix Ex Taq from Takara (Catalog: RR420) and  
799 StepOnePlus Real-Time PCR System for Act5C and  $\alpha$ -tub84B. Primers used are as  
800 follows:

801 Act5C:Forward- 5'ACAACGGCTCTGGCATGTG3',

802 Reverse-5' GGGACGTCCCACAATCGATG3',

803  $\alpha$ -tub84B: Forward-5'CCTTCGTCCACTGGTACGTT3',

804 Reverse-5'GGCGTGACGCTTAGTACTC3'

805 Rp49:Forward-5'CTAAGCTGTCGCACAAATGGC3',

806 Reverse- 5'AA CTTCTTGAATCCGGTGGGC3',

807 Cup:Forward-5'AATCGTTGGGCCACATCCGA3',

808 Reverse-5'TCATAGCCAACCGC CTGTGACT3'

809 Rp49 was used as a house-keeping control.

### 810 **Determination of population distribution of different stages of egg chambers**

811 We quantified the proportion distribution of the different stages of egg chambers in the  
812 wild type and *cup*<sup>01355</sup> egg chambers in an equal number of ovaries (4 pairs). We  
813 stained the egg chambers with an antibody against the protein Cut. Cut is expressed  
814 in the follicle cells of previtellogenic egg chambers (up to stage7). During stage 8-10,  
815 Cut expression is not detected in the follicle cells and the expression of Cut reappears  
816 in the posterior follicle cells after stage10b (Jackson and Blochlinger 1997). We utilised  
817 this dynamic expression of Cut to determine the proportion of different stages of egg



818 chambers in wild type and *cup*<sup>01355</sup> egg chambers. We categorised the previtellogenic  
819 egg chambers which express Cut in early-stage egg chambers, the stages 8-10 where  
820 Cut expression is lost as mid-stage egg chambers and the egg chambers greater than  
821 stage10b where Cut expression reappears as late stage egg chambers. The  
822 percentage of each of this subset of egg chambers was quantified in both wild type  
823 and *cup*<sup>01355</sup> egg chambers obtained from 4 pairs of ovaries, and no significant  
824 difference was observed. The experiment was repeated 3 times, and images were  
825 acquired in Zeiss Axio observer 7 with Apotome.2 module and analysed with Zen 2012  
826 software.

### 827 **Phalloidin intensity calculation**

828 We stained the egg chambers with rhodamine phalloidin and measured the mean  
829 phalloidin intensity of nurse cells of early-stage egg chambers (stages 2-7). We  
830 imaged the nurse cells of early-stage egg chambers by acquiring Z-sections at regular  
831 intervals. All the stacks were compressed and projected as a 2-dimensional maximum  
832 intensity projection (MIP) image. The nurse cell region of the egg chamber, excluding  
833 the outer follicle cell layer was outlined in the MIP image, and phalloidin intensity was  
834 obtained from the software and plotted with statistical tests. Images were acquired in  
835 Zeiss Axio observer 7 with Apotome.2 module and analysed with Zen 2012 software.

### 836 **Delta puncta quantification**

837 To visualise the Delta distribution, the entire wild type and *cup*<sup>01355</sup> stage 8 egg  
838 chambers were imaged taking z sections at regular intervals of 40X magnification in  
839 Zeiss LSM 710 confocal microscope or in Zeiss Axio observer 7 with Apotome.2  
840 module. For quantifying the nurse cell cytoplasmic Delta puncta, the z sections  
841 encompassing the nurse cells were extracted. The z section images at regular

842 intervals of 0.68  $\mu\text{m}$  were used for counting the puncta to avoid overlapping of puncta  
843 amongst the z planes.

844 The particles were counted using the ImageJ software. The nurse cell area, excluding  
845 the follicle cells and oocyte, was outlined for every image. A threshold value was  
846 selected on the basis that each Delta puncta was detected as an individual spot, and  
847 the background was excluded. The particles were automatically counted by <Analyze  
848 Particles> option. The average radius of Delta particles was measured and found to  
849 be within 0.5  $\mu\text{m}$ . The particle size value range was set from 0.2-1.2  $\mu\text{m}^2$  and circularity  
850 was set from 0.5-1. The particles were counted for 9 egg chambers each of control  
851 and *cup*<sup>01355</sup> and the total count of Delta particles for each plane was plotted with  
852 statistical tests.

### 853 **Live delta endocytosis assay**

854 Individual egg chambers were dissected in live imaging media(Prasad et al. 2007).  
855 After dissection replace the LIM with mouse anti-delta (1:20 dilution) containing LIM  
856 and incubate at 25°C for 1 hour. Wash the sample with LIM for two times and fixed the  
857 sample with 4% PFA for 15 mins. Blocking was done with 1X PBS (Sigma-Aldrich,  
858 catalogue no. P3813) containing 0.1% Triton X-100 (Affymetrix, catalogue no. T1001)  
859 and 5% BSA (Bovine Serum Albumin, Amresco, catalogue no. 0332) for 1.5 hours at  
860 room temperature, followed by Secondary antibodies conjugated with Alexa-488 and  
861 Alexa-568 (Molecular Probes) were used at 1:400 dilutions.

### 862 **Delta intensity quantification**

863 To quantify the total Delta protein, z section images of entire stage 8 control and  
864 *cup*<sup>01355</sup> egg chambers (follicle cells and nurse cells) were acquired at regular intervals  
865 of 0.43 $\mu\text{m}$  in Zeiss LSM 710 confocal microscope. The z planes were merged to obtain

866 a 2D MIP image, and the whole egg chamber was outlined to determine the mean  
867 Delta intensity and plotted with statistical tests. Zen 2012 (blue edition) was used to  
868 analyse the images.

### 869 ***upd-lacZ* intensity quantification**

870 The *upd-lacZ* fly stock was a kind gift from Prof. Henry Sun. *upd-lacZ* consists of a  
871 regulatory sequence of Upd gene driving the expression of lacz, which reflects the  
872 transcriptional status of Upd locus.

873 For determining the lacZ protein levels, immunostaining was performed using a  
874 primary antibody against the  $\beta$ -Gal protein. The polar cells at the anterior end of egg  
875 chambers were imaged at 40X taking z sections at regular intervals keeping equal  
876 exposure for experiment and control. All the stacks were merged together to obtain a  
877 2-dimensional maximum intensity projection (MIP) image. The polar cells were  
878 outlined in the MIP image, and mean lacZ intensity was obtained using the Zen 2012  
879 software. Images were acquired in Zeiss Axio observer 7 with Apotome.2 module.

### 880 **Statistical test**

881 Two-tailed t-test of unequal variance in Excel was used to determine the statistical  
882 significance. Standard Error of Mean value was used to plot the error bars. A range  
883 used for assigning the p-value is as follows: p value <0.001 is designated as \*\*\*, p  
884 value <0.01 is designated as \*\*, and 0.05 < p <0.01 is designated as \*. n= number of  
885 egg chambers.

886

### 887 **Acknowledgments**

888 We are thankful to Drs. Henry Sun, Richa Rikhy, Pernille Rorth, Steven Hou,  
889 Daniel St. Johnston and Akira Nakamura for providing the crucial fly stocks and  
890 antibodies. We thank Bloomington Drosophila Stock Centre (BDSC), Kyoto Stock  
891 Center (Japan), Developmental Studies Hybridoma Bank (DSHB), Berkeley  
892 *Drosophila* Genome Project and Centre for Cellular And Molecular Platforms (C-  
893 CAMP) facility (Bangalore, India) for providing reagents and services. We thank IISER  
894 Kolkata imaging facility and in particular Ritabrata Ghosh for help in capturing images  
895 in the confocal LSM 710 microscope.

896

#### 897 **CONFLICT OF INTERESTS**

898 The authors declare that they have no conflict of interests.

899

#### 900 **AUTHOR CONTRIBUTIONS**

901 M.P. conceived the project. B.S., S.A., G.G. and P.D. did the experiments and  
902 captured the images. M.P., B.S., S.A. designed the experiments and interpreted the  
903 results. B.S. S.A., G.G. and P.D prepared the figures. and the final version of the  
904 manuscript.

905

#### 906 **FUNDING**

907 B.S. was supported by the University Grants Commission fellowship from Government  
908 of India. S. A. and P. D. was supported by Junior Research Fellowship from Innovation  
909 in Science Pursuit for Inspired Research, Department of Science and Technology from

910 Govt. of India. GG was supported by Council of Scientific & Industrial Research  
911 (CSIR), India

912

913

## 914 **References**

915 Assa-Kunik, E. et al. 2007. "Drosophila Follicle Cells Are Patterned by Multiple  
916 Levels of Notch Signaling and Antagonism between the Notch and JAK/STAT  
917 Pathways." *Development* 134(January): 1161–69.

918 Bastock, Rebecca, and Daniel St Johnston. 2011. "Oogenesis: Matrix Revolutions."  
919 *Current Biology* 21(6): R231–33.

920 Beccari, Simone, Luís Teixeira, and Pernille Rørth. 2002. "The JAK/STAT Pathway  
921 Is Required for Border Cell Migration during Drosophila Oogenesis."  
922 *Mechanisms of Development* 111(1–2): 115–23.

923 Bland, Christin E., Priscilla Kimberly, and Matthew D. Rand. 2003. "Notch-Induced  
924 Proteolysis and Nuclear Localization of the Delta Ligand." *Journal of Biological  
925 Chemistry* 278(16): 13607–10. <http://dx.doi.org/10.1074/jbc.C300016200>.

926 Bonifacino, Juan S., and Raul Rojas. 2006. "Retrograde Transport from Endosomes  
927 to the Trans-Golgi Network." *Nature Reviews Molecular Cell Biology* 7(8): 568–  
928 79.

929 Le Borgne, Roland, and François Schweisguth. 2003. "Unequal Segregation of  
930 Neuralized Biases Notch Activation during Asymmetric Cell Division."  
931 *Developmental Cell* 5(1): 139–48.

932 Bray, Sarah J. 2006. "Notch Signalling: A Simple Pathway Becomes Complex."

- 933 *Nature Reviews Molecular Cell Biology* 7(9): 678–89.
- 934 Broyer, Risa M., Elena Monfort, and James E. Wilhelm. 2017. “Cup Regulates Oskar  
935 mRNA Stability during Oogenesis.” *Developmental Biology* 421: 77–85.
- 936 Bucci, Cecilia et al. 1992. “The Small GTPase Rab5 Functions as a Regulatory  
937 Factor in the Early Endocytic Pathway.” *Cell* 70(5): 715–28.
- 938 Chigurupati, Srinivasulu et al. 2007. “Involvement of Notch Signaling in Wound  
939 Healing.” (11).
- 940 Ciruna, Brian, and Janet Rossant. 2001. “FGF Signaling Regulates Mesoderm Cell  
941 Fate Specification and Morphogenetic Movement at the Primitive Streak.”  
942 *Developmental Cell* 1(1): 37–49.
- 943 Cooley, Lynn, and Esther Verheyen. 2003. “Cell 1992 Cooleychickadee Encodes a  
944 Profilin Required.” 69: 1–12. [papers2://publication/uuid/F354D1F5-FF93-43EE-85DE-D533289557BA](https://pubmed.ncbi.nlm.nih.gov/12511111/).
- 946 Davidson, E H, R a Cameron, and a Ransick. 1998. “Specification of Cell Fate in the  
947 Sea Urchin Embryo: Summary and Some Proposed Mechanisms.” *Development*  
948 *(Cambridge, England)* 125(17): 3269–90.
- 949 Dollar, Gretchen, Eric Struckhoff, Jason Michaud, and Robert S. Cohen. 2002.  
950 “Rab11 Polarization of the *Drosophila* Oocyte: A Novel Link between Membrane  
951 Trafficking, Microtubule Organization, and Oskar mRNA Localization and  
952 Translation.” *Development* 129(2): 517–26.
- 953 Duchek, P, and P Rorth. 2001. “Guidance of Cell Migration by EGF Receptor  
954 Signaling during *Drosophila* Oogenesis.” *Science (New York, N.Y.)* 291(5501):  
955 131–33.

- 956 Duchek, Peter et al. 2001. "Guidance of Cell Migration by the Drosophila  
957 PDGF/VEGF Receptor." *Cell* 107(1): 17–26.
- 958 Edlund, Thomas, and Thomas M. Jessell. 1999. "Progression from Extrinsic to  
959 Intrinsic Signaling in Cell Fate Specification: A View from the Nervous System."  
960 *Cell* 96(2): 211–24.
- 961 Friedl, Peter, and Darren Gilmour. 2009. "Collective Cell Migration in  
962 Morphogenesis, Regeneration and Cancer." *Nature Reviews Molecular Cell  
963 Biology* 10(7): 445–57.
- 964 Futter, Clare E., Adele Pearse, Lindsay J. Hewlett, and Colin R. Hopkins. 1996.  
965 "Multivesicular Endosomes Containing Internalized EGF-EGF Receptor  
966 Complexes Mature and Then Fuse Directly with Lysosomes." *Journal of Cell  
967 Biology* 132(6): 1011–23.
- 968 Giagtzoglou, Nikolaos et al. 2012. "DEHBP1 Controls Exocytosis and Recycling of  
969 Delta during Asymmetric Divisions." *Journal of Cell Biology* 196(1): 65–83.
- 970 Guerra, Flora, and Cecilia Bucci. 2016. "Multiple Roles of the Small GTPase Rab7."  
971 *Cells* 5(3).
- 972 Hayashi, Yoshiki et al. 2012. "Glypicans Regulate JAK/STAT Signaling and  
973 Distribution of the Unpaired Morphogen." *Development* 139(22): 4162–71.
- 974 Horne-Badovinac, Sally, and David Bilder. 2005. "Mass Transit: Epithelial  
975 Morphogenesis in the Drosophila Egg Chamber." *Developmental Dynamics*  
976 232(3): 559–74.
- 977 Huynh, Jean René, and Daniel St Johnston. 2004. "The Origin of Asymmetry: Early  
978 Polarisation of the Drosophila Germline Cyst and Oocyte." *Current Biology*

979 14(11): 438–49.

980 Jackson, S M, and K Blochlinger. 1997. “Cut Interacts with Notch and Protein Kinase  
981 A to Regulate Egg Chamber Formation and to Maintain Germline Cyst Integrity  
982 during *Drosophila* Oogenesis.” *Development (Cambridge, England)* 124(18):  
983 3663–72.

984 Jiang, Jianxin, Li Li, Yong He, and Min Zhao. 2013. “Collective Cell Migration:  
985 Implications for Wound Healing and Cancer Invasion.” *Burns & Trauma* 1(1): 21.

986 Kang, Di et al. 2018. “The InR/Akt/TORC1 Growth-Promoting Signaling Negatively  
987 Regulates JAK/STAT Activity and Migratory Cell Fate during Morphogenesis.”  
988 *Developmental Cell* 44(4): 524-531.e5.  
989 <https://doi.org/10.1016/j.devcel.2018.01.017>.

990 Kelley, Mark R, Simon Kidd, Walter A Deutsch, and Michael W Young. 1987.  
991 “Mutations Altering the Structure of Epidermal Growth Factor-like Coding  
992 Sequences at the *Drosophila* Notch Locus.” 51: 539–48.

993 Kopan, Raphael, and Ma Xenia G. Ilagan. 2009. “The Canonical Notch Signaling  
994 Pathway: Unfolding the Activation Mechanism.” *Cell* 137(2): 216–33.

995 Kovall, Rhett A., Brian Gebelein, David Sprinzak, and Raphael Kopan. 2017. “The  
996 Canonical Notch Signaling Pathway: Structural and Biochemical Insights into  
997 Shape, Sugar, and Force.” *Developmental Cell* 41(3): 228–41.  
998 <http://dx.doi.org/10.1016/j.devcel.2017.04.001>.

999 Lin, Tzu Huai, Tsung Han Yeh, Tsu Wei Wang, and Jenn Yah Yu. 2014. “The Hippo  
1000 Pathway Controls Border Cell Migration through Distinct Mechanisms in Outer  
1001 Border Cells and Polar Cells of the *Drosophila* Ovary.” *Genetics* 198(3): 1087–



- 1002 99.
- 1003 MacDonald, Ewan, Bryan Savage, and Tobias Zech. 2020. "Connecting the Dots:  
1004 Combined Control of Endocytic Recycling and Degradation." *Biochemical*  
1005 *Society Transactions* 48(6): 2377–86.
- 1006 McDonald, J. A. 2003. "PVF1, a PDGF/VEGF Homolog, Is Sufficient to Guide Border  
1007 Cells and Interacts Genetically with Taiman." *Development* 130(15): 3469–78.
- 1008 McGregor, Jennifer R, Rongwen Xi, and Douglas A Harrison. 2002. "JAK Signaling  
1009 Is Somatically Required for Follicle Cell Differentiation in Drosophila."  
1010 *Development (Cambridge, England)* 129(3): 705–17.
- 1011 Miao, Guangxia, Dorothea Godt, and Denise J. Montell. 2020. "Integration of  
1012 Migratory Cells into a New Site In Vivo Requires Channel-Independent  
1013 Functions of Innexins on Microtubules." *Developmental Cell* 54(4): 501-515.e9.  
1014 <https://doi.org/10.1016/j.devcel.2020.06.024>.
- 1015 Monahan, Amanda J., and Michelle Starz-Gaiano. 2015. "Socs36E Limits STAT  
1016 Signaling via Cullin2 and a SOCS-Box Independent Mechanism in the  
1017 Drosophila Egg Chamber." *Mechanisms of Development* 138: 313–27.
- 1018 Montell, D J, P Rorth, and A C Spradling. 1992. "Slow Border Cells, a Locus  
1019 Required for a Developmentally Regulated Cell Migration during Oogenesis,  
1020 Encodes Drosophila C/EBP." *Cell* 71(1): 51–62.
- 1021 Montell, Denise J. 2003. "Border-Cell Migration: The Race Is On." *Nature Reviews*  
1022 *Molecular Cell Biology* 4(1): 13–24.
- 1023 Montell, Denise J. 2001. "Command and Control : Regulatory Pathways Controlling  
1024 Invasive Behavior of the Border Cells." 105: 19–25.

- 1025 Naora, Honami, and Denise J. Montell. 2005. "Ovarian Cancer Metastasis:  
1026 Integrating Insights from Disparate Model Organisms." *Nature Reviews Cancer*  
1027 5(5): 355–66.
- 1028 Nelson, Meryl R., Andrew M. Leidal, and Craig A. Smibert. 2004. "Drosophila Cup Is  
1029 an EIF4E-Binding Protein That Functions in Smaug-Mediated Translational  
1030 Repression." *EMBO Journal* 23(1): 150–59.
- 1031 Nichols, James T., Alison Miyamoto, and Gerry Weinmaster. 2007. "Notch Signaling  
1032 - Constantly on the Move." *Traffic* 8(8): 959–69.
- 1033 Pasqualato, Sebastiano et al. 2004. "The Structural GDP/GTP Cycle of Rab11  
1034 Reveals a Novel Interface Involved in the Dynamics of Recycling Endosomes."  
1035 *Journal of Biological Chemistry* 279(12): 11480–88.  
1036 <http://dx.doi.org/10.1074/jbc.M310558200>.
- 1037 Perrimon, Norbert, Chrysoula Pitsouli, and Ben-Zion Shilo. 2012. "Signaling  
1038 Mechanisms Controlling Cell Fate and Embryonic Patterning." *Cold Spring*  
1039 *Harbor perspectives in biology* 4(8): a005975.
- 1040 Prasad, Mohit et al. 2007. "A Protocol for Culturing *Drosophila Melanogaster* Stage 9  
1041 Egg Chambers for Live Imaging." *Nature Protocols* 2(10): 2467–73.
- 1042 Rørth, Pernille. 2009. "Collective Cell Migration." *Annual Review of Cell and*  
1043 *Developmental Biology* 25(1): 407–29.
- 1044 Ruohola, H. et al. 1991. "Role of Neurogenic Genes in Establishment of Follicle Cell  
1045 Fate and Oocyte Polarity during Oogenesis in *Drosophila*." *Cell* 66(3): 433–49.
- 1046 Schroeter, E. H., J. A. Kisslinger, and R. Kopan. 1998. "Notch-1 Signalling Requires  
1047 Ligand-Induced Proteolytic Release of Intracellular Domain." *Nature* 393(6683):

1048 382–86.

1049 Shi, Shaolin, Mark Stahl, Linchao Lu, and Pamela Stanley. 2005. “Canonical Notch

1050 Signaling Is Dispensable for Early Cell Fate Specifications in Mammals.”

1051 *Molecular and Cellular Biology* 25(21): 9503–8.

1052 Silver, D L, and D J Montell. 2001. “Paracrine Signaling through the JAK/STAT

1053 Pathway Activates Invasive Behavior of Ovarian Epithelial Cells in *Drosophila*.”

1054 *Cell* 107(7): 831–41.

1055 Spradling, A. 1993. “Developmental Genetics of Oogenesis.” *The development of*

1056 *Drosophila melanogaster* 4(September): 1–70.

1057 Starz-Gaiano, Michelle et al. 2008. “Feedback Inhibition of JAK/STAT Signaling by

1058 Apontic Is Required to Limit an Invasive Cell Population.” *Developmental Cell*

1059 14(5): 726–38.

1060 Stec, W., O. Vidal, and M. P. Zeidler. 2013. “*Drosophila* SOCS36E Negatively

1061 Regulates JAK/STAT Pathway Signaling via Two Separable Mechanisms.”

1062 *Molecular Biology of the Cell* 24(18): 3000–3009.

1063 Szafranski, Przemyslaw, and Scott Goode. 2007. “Basolateral Junctions Are

1064 Sufficient to Suppress Epithelial Invasion during *Drosophila* Oogenesis.”

1065 *Developmental Dynamics* 236(2): 364–73.

1066 Thiery, Jean Paul, Hervé Acloque, Ruby Y.J. Huang, and M. Angela Nieto. 2009.

1067 “Epithelial-Mesenchymal Transitions in Development and Disease.” *Cell* 139(5):

1068 871–90.

1069 Tsai, Yu Chen, and Y. Henry Sun. 2004. “Long-Range Effect of Upd, a Ligand for

1070 Jak/STAT Pathway, on Cell Cycle in *Drosophila* Eye Development.” *Genesis*

1071 39(2): 141–53.

1072 Ullrich, Oliver et al. 1996. “Rab11 Regulates Recycling through the Pericentriolar

1073 Recycling Endosome.” *Journal of Cell Biology* 135(4): 913–24.

1074 Wilhelm, James E., Meredith Hilton, Quinlan Amos, and William J. Henzel. 2003.

1075 “Cup Is an EIF4E Binding Protein Required for Both the Translational

1076 Repression of Oskar and the Recruitment of Barentsz.” *Journal of Cell Biology*

1077 163(6): 1197–1204.

1078

1079

1080 **Supplementary figures**

1081 **Supplementary figure 1**

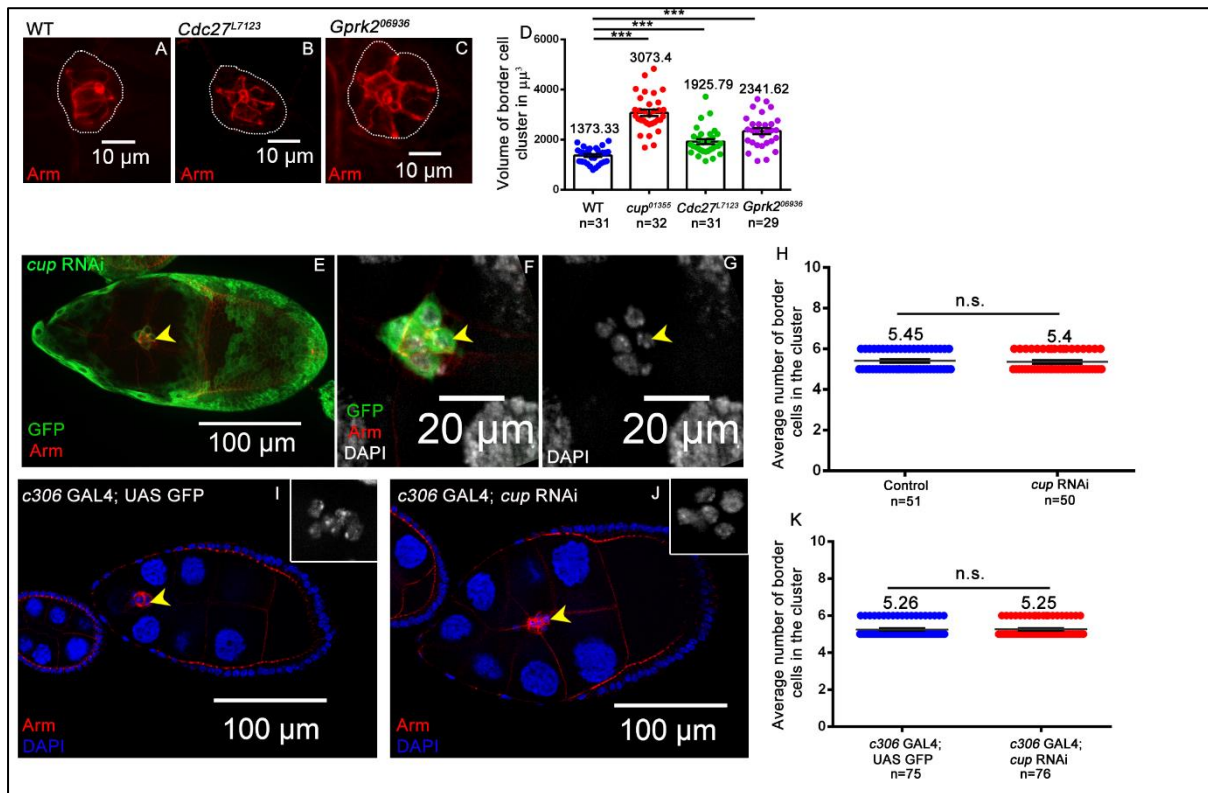

1082

**Figure S1: Cup functions in nurse cells to regulate border cell cluster size**

**(A-D)** Respective homozygous mutant egg chambers exhibit increased border cell cluster size Armadillo (red), compared to wild type. The white dotted line marks the BC cluster.

**(E-H)** Anterior follicle cells along with border cell cluster expressing *cup* RNAi; clones marked by GFP (green), Armadillo (red), and DAPI (blue and grey) does not alter the number of border cells in the cluster compared to egg chambers without clones. The yellow arrow indicates the border cell cluster.

**(I-K)** Expression of *cup* RNAi in anterior follicle cells using *c306* GAL4 driver does not alter the number of border cells in the cluster compared to control egg chambers. Yellow arrow indicates the border cell cluster.

1083

1084

1085 **Supplementary figure 2**

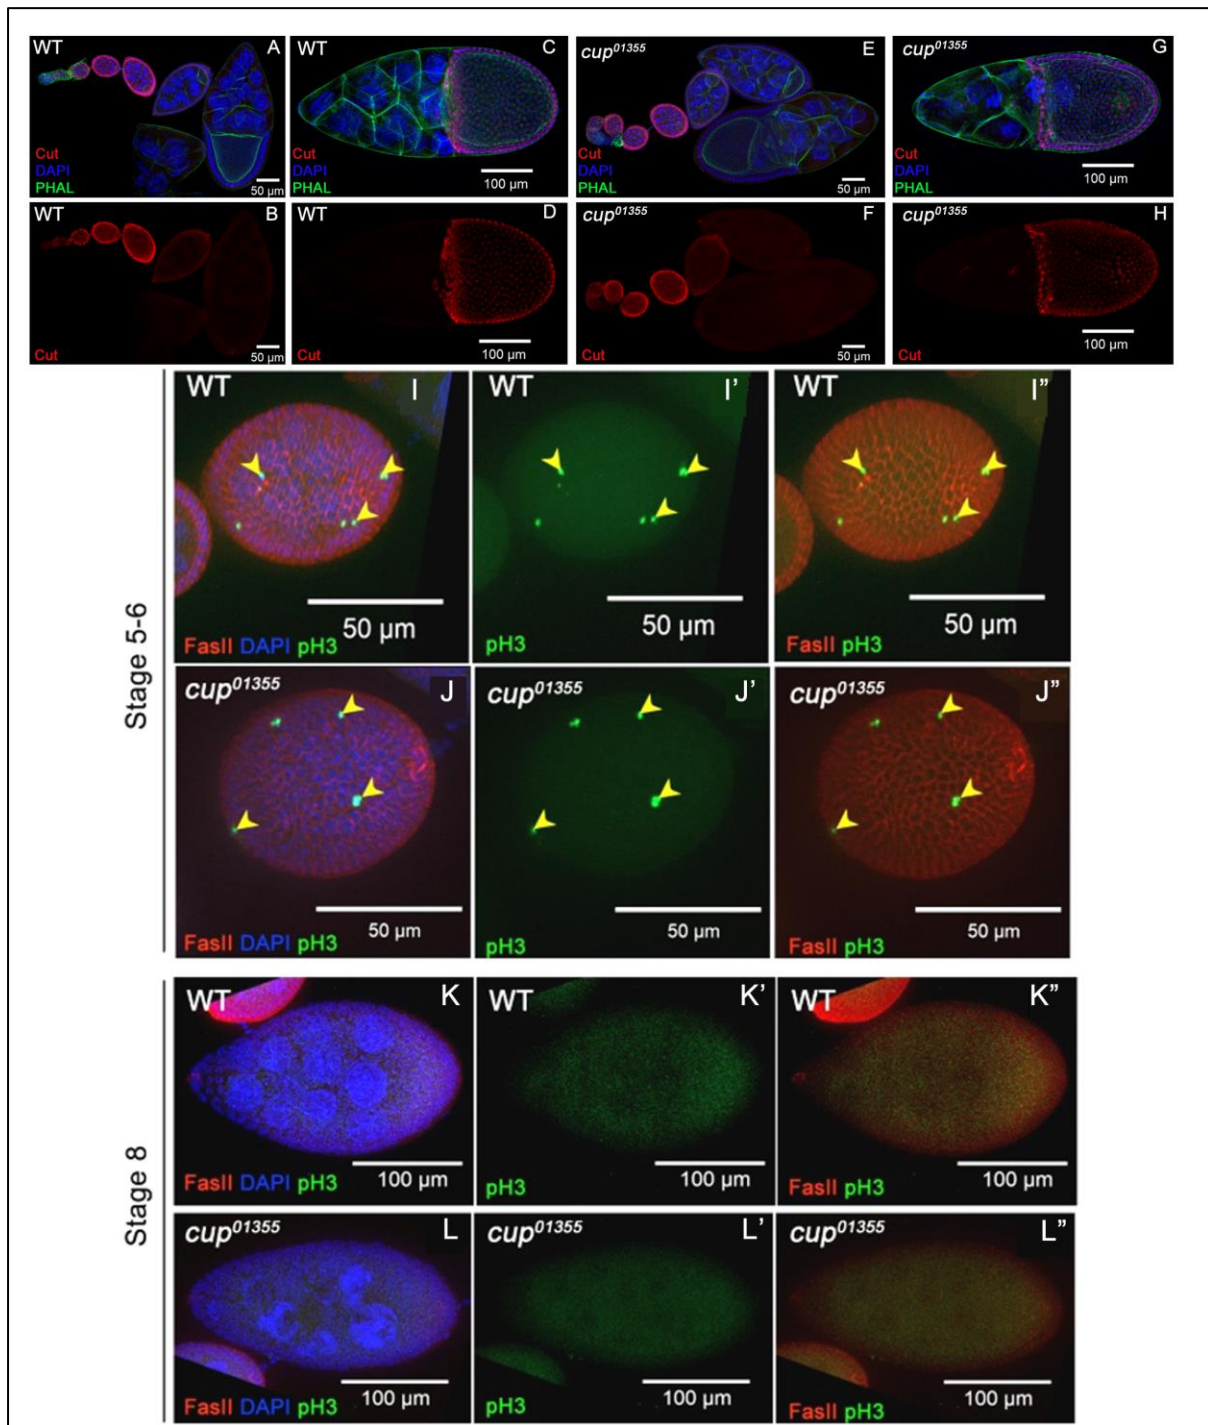

1086

1087

**Figure S2: Cup mutation does not alter distribution of different stages of egg chambers**

(A-H) Expression endoreplication marker Cut in *cup*<sup>01355</sup> early and late-stage (> stage10) egg chambers. Cut (red), Phalloidin (green), DAPI (blue).

(I-L') Phospho histone 3 (pH3) staining is observed only in early stage egg chambers (up to stage 6) in both wild type and *cup*01355 egg chambers (yellow arrow). The presence of FasII indicates it to be early egg chamber. pH3 staining is not observed in stage8/9 egg chambers of wild type and *cup*01355 egg chambers indicating no cell proliferation after stage 7.

1088

1089

1090

1091

1092

1093

1094

1095

1096

1097

1098

1099

1100

1101

1102

1103

1104

1105

1106

1107

1108

1109

1110

1111 **Supplementary figure 3**

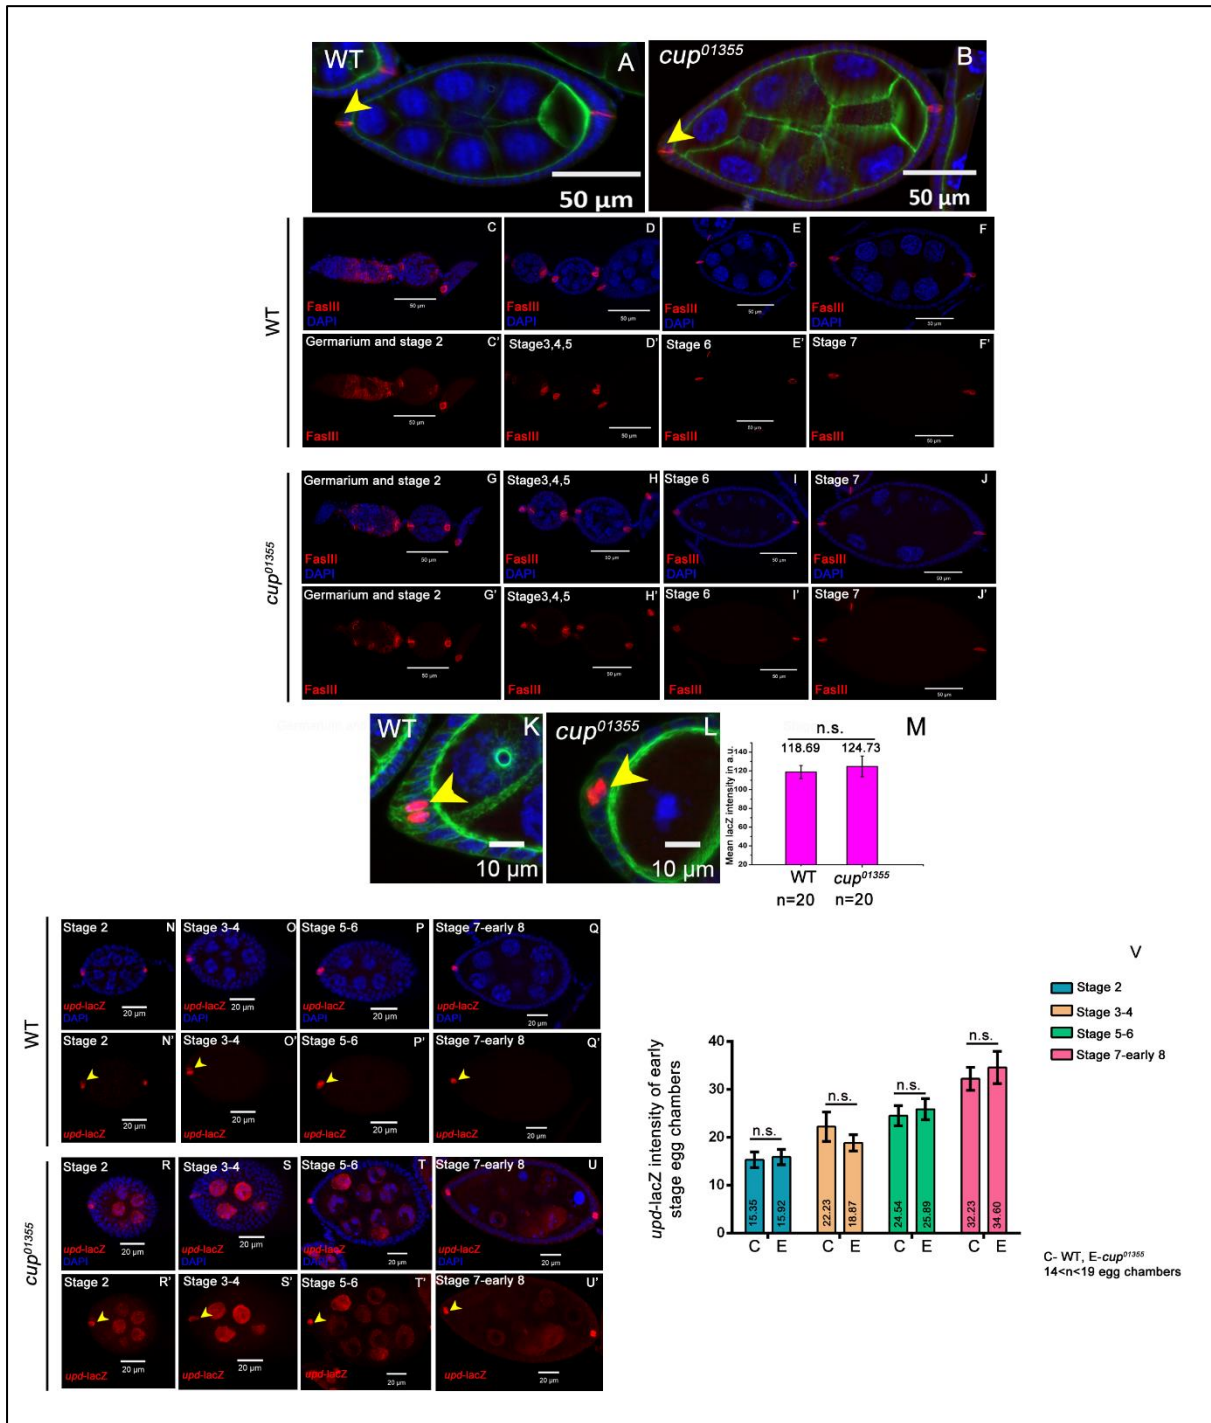



**Figure S3: Cup mutation does not affect polar cell specification and Upd ligand production.**

**(A-B)** Number of polar cells is same in wild type and *cup*<sup>01355</sup> stage 8 egg chamber indicated by FasIII staining (red). Phalloidin (green), DAPI (blue). The yellow arrow indicates polar cells.

**(C-J')** Number of polar cells are same in the early stages of oogenesis (stage2-7) in wild-type and *cup*<sup>01355</sup> egg chambers indicated by FasIII staining (red), and DAPI (blue).

**(K-M)** *upd-lacZ* intensity of polar cells is not changed in stage 8 *cup*<sup>01355</sup> egg chambers as compared to wild type. *lacZ* (red), Phalloidin (green), DAPI (blue), and yellow arrow indicate polar cells.

**(N-V)** *upd-lacZ* intensity of polar cells is not changed in early-stage (2-7) *cup*<sup>01355</sup> egg chambers as compared to wild type. *lacZ* (red), DAPI (blue), and yellow arrow indicates polar cells. Error bars SEM, t-test.

1113

1114

1115

1116

1117

1118

1119

1120

1121

1122

1123

1124

1125

1126

1127

1128

1129

1130

1131

1132

1133 **Supplementary figure 4**

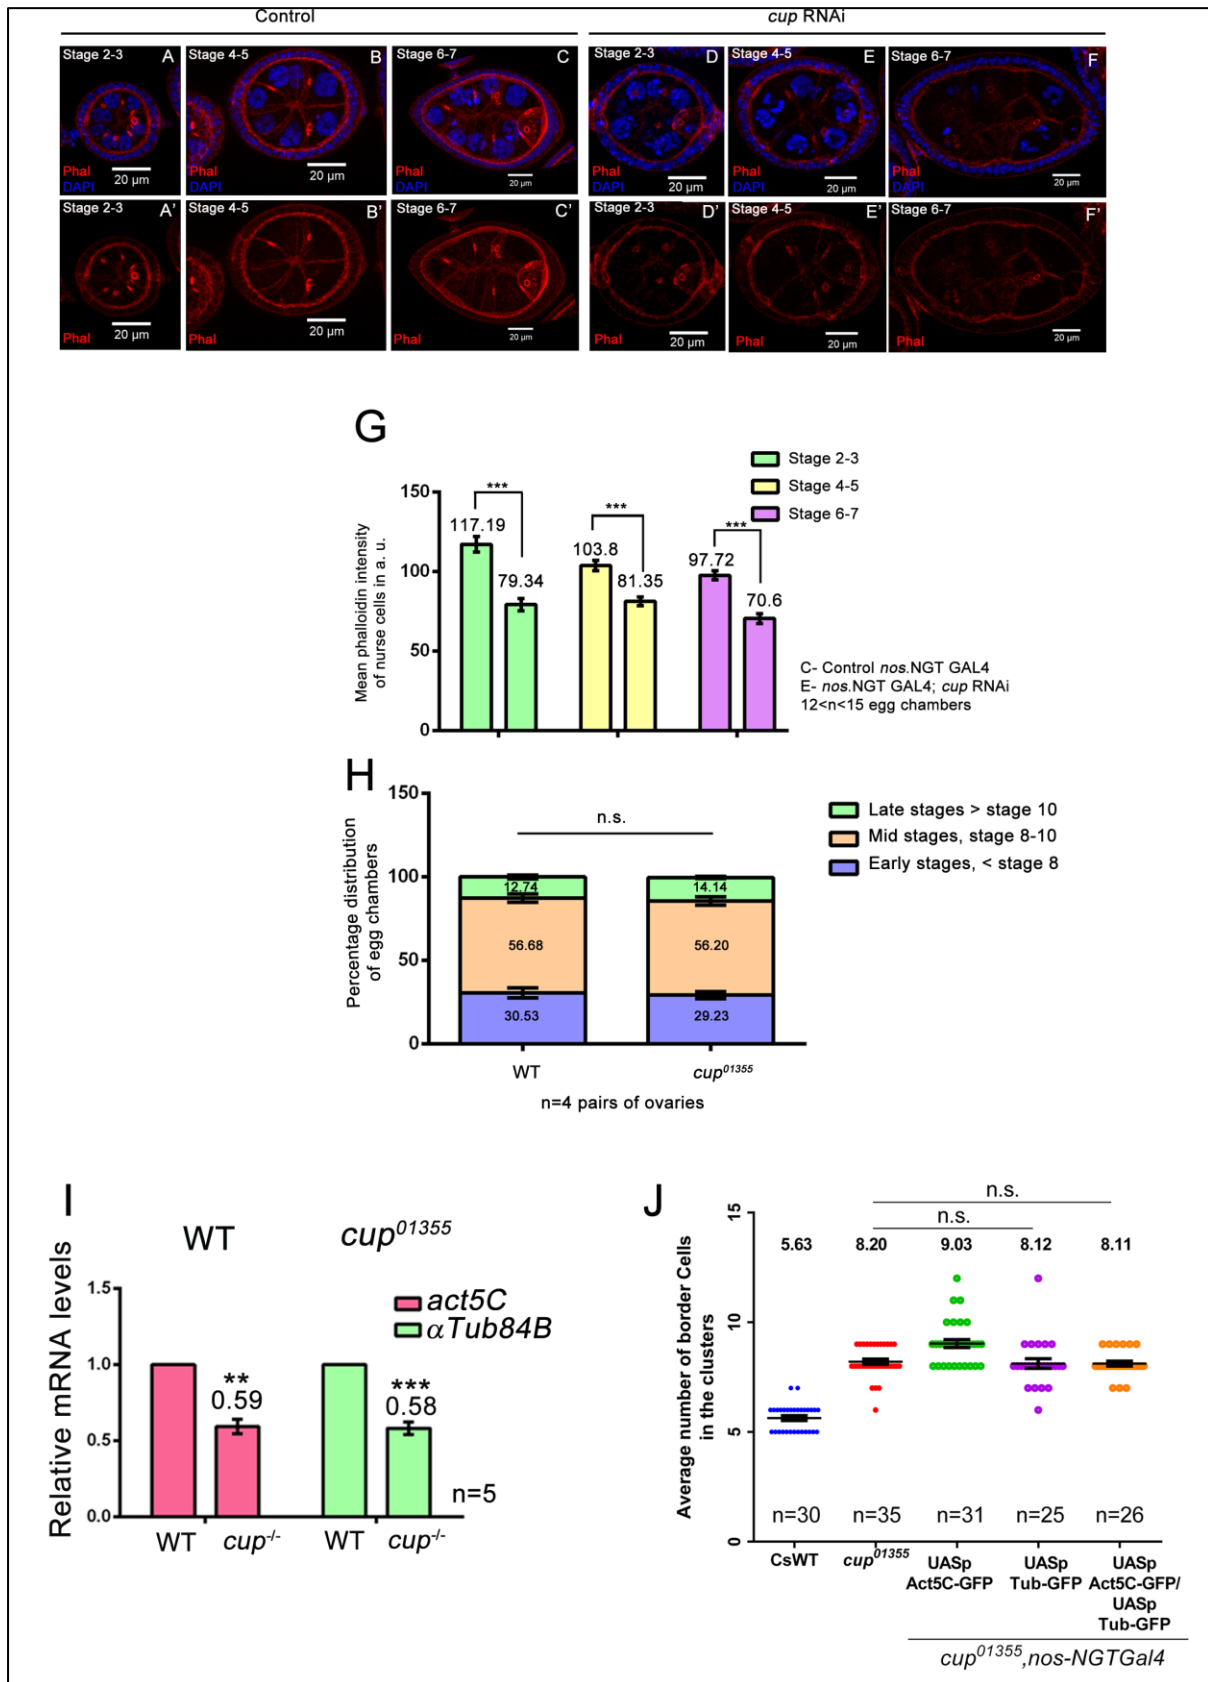

1134

1135

**Figure S4: Cup maintains nurse cell cytoskeleton in early stages of oogenesis.**

**(A-G)** Phalloidin intensity of early-stage egg chambers (2-7) is lowered when cup RNAi is expressed in the nurse cells as compared to control.

**(H)** The population of different stages of egg chambers is similar in WT and *cup*<sup>01355</sup> ovaries.

**(I)** Graph representing the relative mRNA levels of *Act-5C* and *α-tub84B* in cup mutant and WT egg chambers

**(J)** Over expression of actin and tubulin in nurse cells of *cup*<sup>01355</sup> egg, chambers do not rescue border cell number.

1136

1137

1138

1139

1140

1141

1142

1143 **Supplementary figure 5**

1144

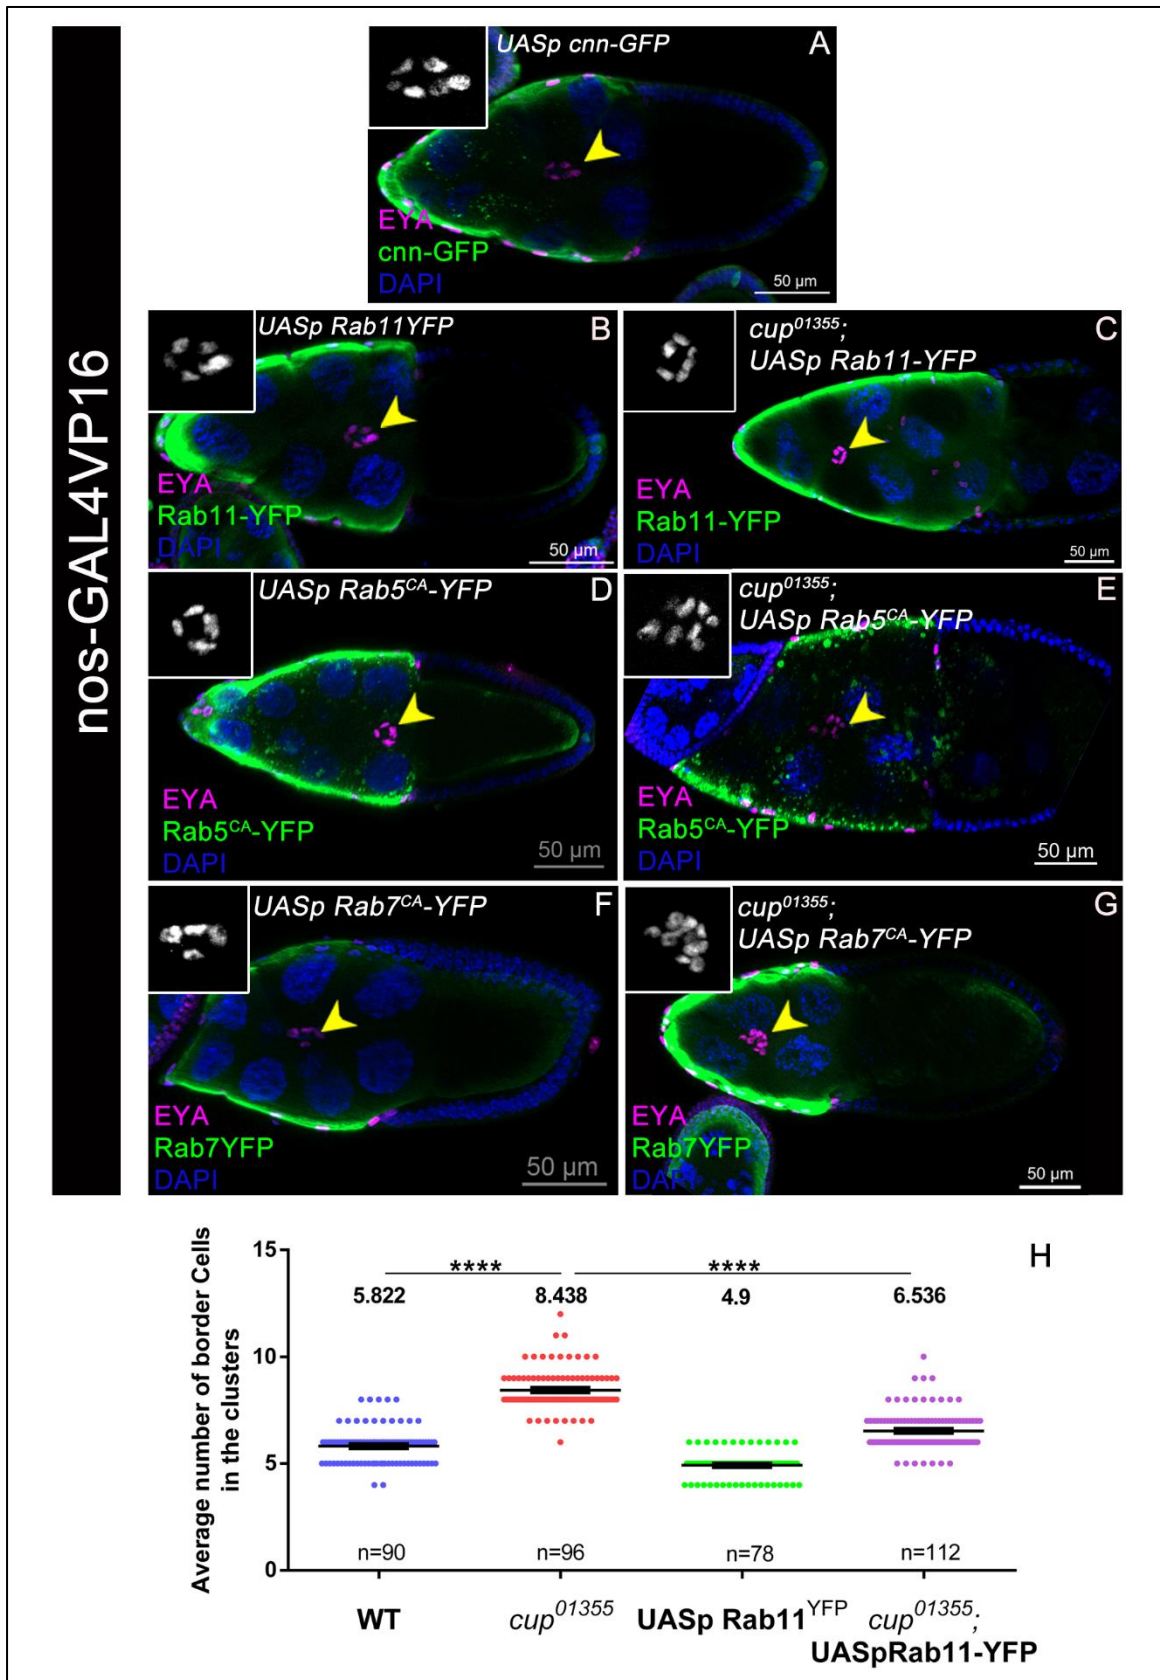

1145

**Figure S5: Interaction between Rab GTPases and cup**

(A-G) Stage 10 egg chambers of indicated genotypes stained with EYA in magenta, DAPI in blue, inset grey, and YFP in green, yellow arrowheads mark the border cell cluster.

(H) No. of border cells are rescued when WT Rab11 is overexpressed in nurse cells of cup01355 egg chambers as compared to cup01355 egg chambers.

1146

1147

1148 **Table S1: The list of female sterile lines screened harbouring germline specific**  
1149 **gene mutations**

| Germline expressed gene | Allele screened                     | Homozygous viability |
|-------------------------|-------------------------------------|----------------------|
| <i>Gprk2</i>            | <i>Gprk2</i> <sup>06936</sup>       | Viable               |
| <i>orb</i>              | <i>orb</i> <sup>dec</sup>           | Not viable           |
| <i>spn-E</i>            | <i>spn-E</i> <sup>hls-03987</sup>   | Not viable           |
| <i>pum</i>              | <i>pum</i> <sup>01688</sup>         | Not viable           |
| <i>E(var)3-9</i>        | <i>E(var)3-9</i> <sup>DG08508</sup> | Not viable           |
| <i>bel</i>              | <i>bel</i> <sup>neo30</sup>         | Not viable           |
| <i>Cdc27</i>            | <i>Cdc27</i> <sup>L7123</sup>       | Viable               |
| <i>hts</i>              | <i>hts</i> <sup>k06121</sup>        | Not viable           |
| <i>Ote</i>              | <i>Ote</i> <sup>B279</sup>          | Not viable           |
| <i>rhi</i>              | <i>rhi</i> <sup>02086</sup>         | Not viable           |
| <i>psq</i>              | <i>psq</i> <sup>KG01598</sup>       | Not viable           |
| <i>piwi</i>             | <i>piwi</i> <sup>2</sup>            | Not viable           |
| <i>Rbp9</i>             | <i>Rbp9</i> <sup>P2690</sup>        | Not viable           |
| <i>cup</i>              | <i>cup</i> <sup>01355</sup>         | Viable               |

1150

1151
